# Supplementary material for: Comprehensive biological information analysis of PTEN gene in pan-cancer
Source: Research Square preprint supplement (doi:10.21203/rs.3.rs-388887/v1), 2021-04-12
Supplement: Supplementary file 1 [file 95940aeefc8ab62596ebc19b.docx]

**Dear Editors:**

We would like to submit the enclosed manuscript entitled “Comprehensive biological information analysis of PTEN gene in pan-cancer”, which we wish to be considered for publication in CANCER CELL INTERNATIONAL.

In this work, we conducted a comprehensive bioinformatics analysis of the PTEN gene, and elaborated on the potential application value of PTEN and its correlated genes in cancer treatment. I hope this paper is suitable for CANCER CELL INTERNATIONAL.

No conflict of interest exits in the submission of this manuscript, and manuscript is approved by all authors for publication. We would like to declare that the work described was original research that has not been published previously, and not under consideration for publication elsewhere, in whole or in part. All the authors listed have approved the manuscript that is enclosed.

We deeply appreciate your consideration of our manuscript, and we look forward to receiving comments from the reviewers. If you have any queries, please don’t hesitate to contact us at the address below.

Thank you and best regards.

Yours sincerely,

Hang Zhang, Wenhan Zhou, Xiaoyi Yang, Shuzhan Wen, Baicheng Zhao, Jiale Feng and Shuying Chen

Corresponding author:

Name: Shuying Chen

E-mail: xsjrmt@163.com
