# Supplementary material for: Comprehensive biological information analysis of PTEN gene in pan-cancer
Source: Research Square preprint supplement (doi:10.21203/rs.3.rs-388887/v1), 2021-04-12
Supplement: Supplementary file 3 [file Figure S2-PTEN Expression in different subtypes of cancers.pdf › Supplementary Material/Figure S2-PTEN Expression in different subtypes of cancers.pdf]

## Panel 1. *PTEN* expression in urologic tumours.

A.

Expression of *PTEN* in BLCA based on Histological subtypes

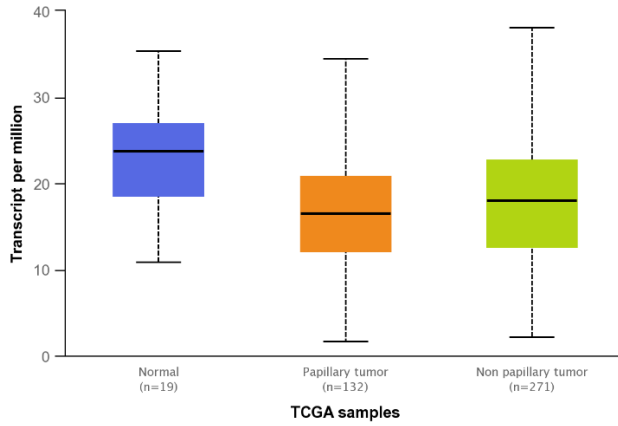

| Comparison                              | Statistical significance |
|-----------------------------------------|--------------------------|
| Normal-vs-Papillary tumors              | 1.362730E-03             |
| Normal-vs-NonPapillary tumors           | 4.456500E-03             |
| Papillary tumors-vs-NonPapillary tumors | 2.386600E-01             |

B.

Expression of *PTEN* based on molecular subtypes of BLCA

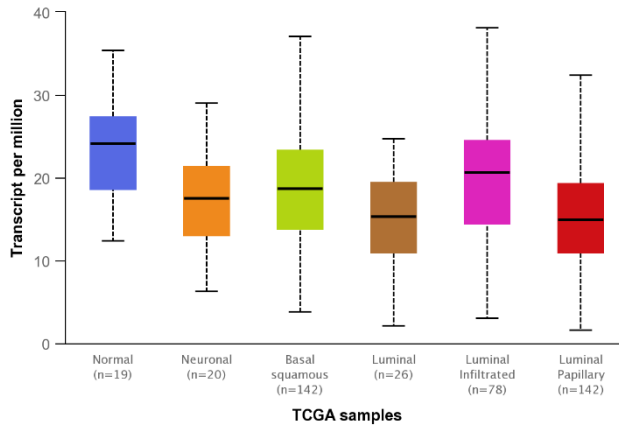

| Comparison                               | Statistical significance |
|------------------------------------------|--------------------------|
| Normal-vs-Neuronal                       | 4.642500E-03             |
| Normal-vs-Basal squamous                 | 4.781900E-03             |
| Normal-vs-Luminal                        | 2.10439999999741E-05     |
| Normal-vs-Luminal_Infiltrated            | 1.191370E-01             |
| Normal-vs-Luminal_Papillary              | 2.23019999999741E-05     |
| Neuronal-vs-Basal squamous               | 4.024800E-01             |
| Neuronal-vs-Luminal                      | 7.763600E-02             |
| Neuronal-vs-Luminal_Infiltrated          | 1.385620E-01             |
| Neuronal-vs-Luminal_Papillary            | 3.686800E-01             |
| Basal squamous-vs-Luminal                | 2.439500E-03             |
| Basal squamous-vs-Luminal_Infiltrated    | 1.511420E-01             |
| Basal squamous-vs-Luminal_Papillary      | 6.981600E-04             |
| Luminal-vs-Luminal_Infiltrated           | 1.352190E-04             |
| Luminal-vs-Luminal_Papillary             | 2.987000E-01             |
| Luminal_Infiltrated-vs-Luminal_Papillary | 4.31389999999698E-05     |

C.

Expression of PTEN in BLCA based on patient's smoking habits

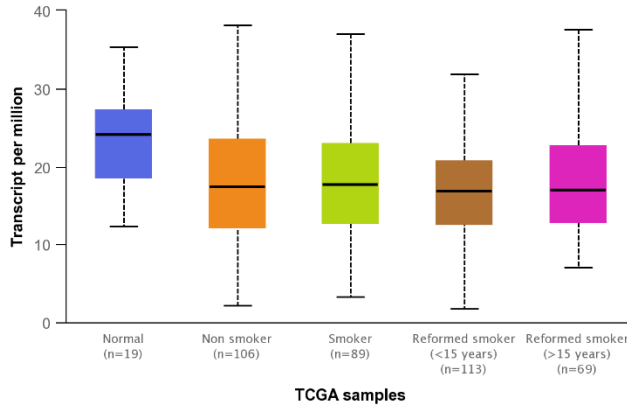

| Comparison                           | Statistical significance |
|--------------------------------------|--------------------------|
| Normal-vs-Non smoker                 | 1.281050E-03             |
| Normal-vs-Smoker                     | 4.784700E-03             |
| Normal-vs-Reformed smoker1           | 2.446300E-04             |
| Normal-vs-Reformed smoker2           | 6.636600E-03             |
| Non smoker-vs-Smoker                 | 5.367800E-01             |
| Non smoker-vs-Reformed smoker1       | 5.817400E-01             |
| Non smoker-vs-Reformed smoker2       | 5.266800E-01             |
| Smoker-vs-Reformed smoker1           | 2.428800E-01             |
| Smoker-vs-Reformed smoker2           | 9.550000E-01             |
| Reformed smoker1-vs-Reformed smoker2 | 2.507400E-01             |

D.

Expression of PTEN in KIRP based on histologic subtypes

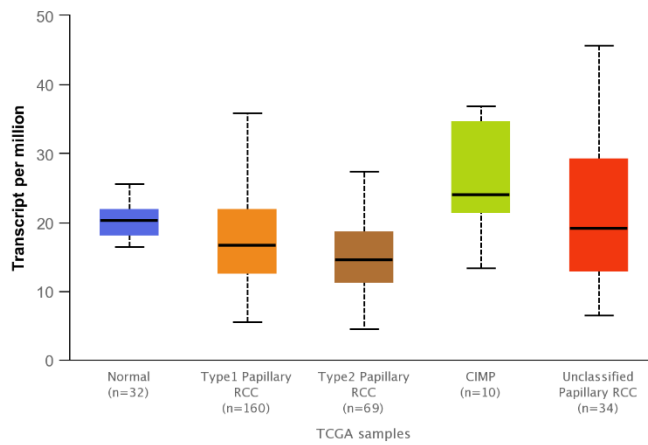

| Comparison                      | Statistical significance |
|---------------------------------|--------------------------|
| Normal-VS-Type1 PRCC            | 1.362310E-03             |
| Normal-VS-Type2 PRCC            | 3.72520000000431E-05     |
| Normal-VS-KIRP CIMP             | 1.099190E-01             |
| Normal-VS-Unclassified PRCC     | 5.635600E-01             |
| Type1 PRCC-VS-Type2 PRCC        | 1.651950E-01             |
| Type1 PRCC-VS-KIRP CIMP         | 8.429800E-04             |
| Type1 PRCC-VS-Unclassified PRCC | 7.194200E-02             |
| Type2 PRCC-VS-KIRP CIMP         | 7.035500E-04             |
| Type2 PRCC-VS-Unclassified PRCC | 9.359000E-03             |
| KIRP CIMP-VS-Unclassified PRCC  | 1.731440E-01             |

E.

Expression of PTEN in PRAD based on molecular signature

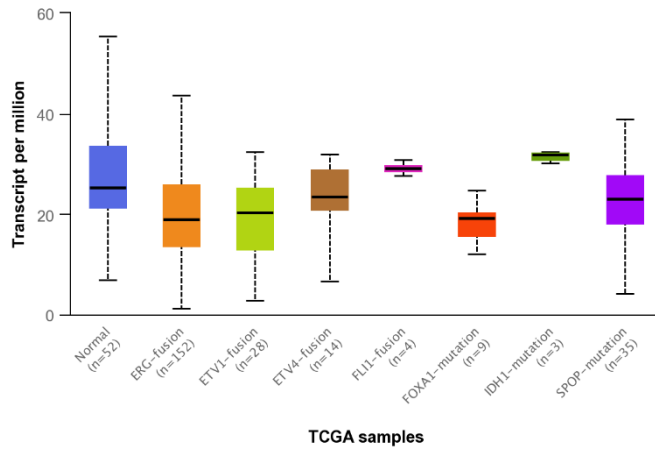

| Comparison                    | Statistical significance |
|-------------------------------|--------------------------|
| Normal-vs-ERG fusion          | 1.59996999999912E-05     |
| Normal-vs-ETV1 fusion         | 3.51769999999973E-05     |
| Normal-vs-ETV4 fusion         | 9.179500E-02             |
| Normal-vs-FLI1 fusion         | 4.216200E-01             |
| Normal-vs-FOXA1 mutation      | 1.563590E-04             |
| Normal-vs-IDH1 mutation       | 8.805000E-01             |
| Normal-vs-SPOP mutation       | 1.123780E-02             |
| ERG fusion-vs-ETV1 fusion     | 6.022000E-01             |
| ERG fusion-vs-ETV4 fusion     | 2.195400E-01             |
| ERG fusion-vs-FLI1 fusion     | 1.60359999723525E-08     |
| ERG fusion-vs-FOXA1 mutation  | 8.293200E-01             |
| ERG fusion-vs-IDH1 mutation   | 4.40290000014443E-07     |
| ERG fusion-vs-SPOP mutation   | 3.252100E-02             |
| ETV1 fusion-vs-ETV4 fusion    | 1.477150E-01             |
| ETV1 fusion-vs-FLI1 fusion    | 1.582699999994687E-06    |
| ETV1 fusion-vs-FOXA1 mutation | 8.219200E-01             |
| ETV1 fusion-vs-IDH1 mutation  | 1.52639999972948E-07     |
| ETV1 fusion-vs-SPOP mutation  | 3.516500E-02             |

F.

Expression of PTEN in PRAD based on patient's gleason score

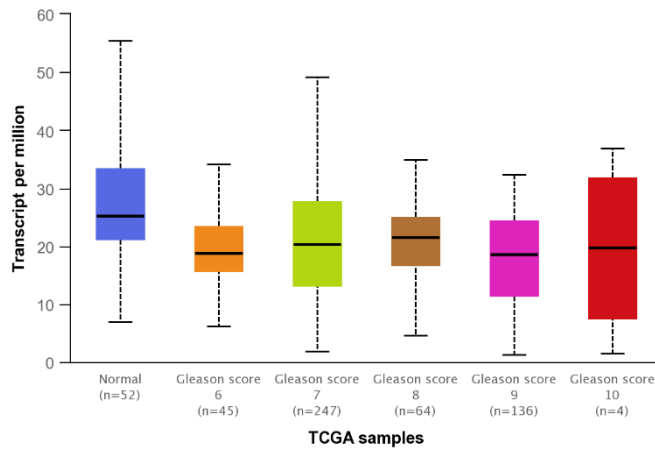

| Comparison                          | Statistical significance |
|-------------------------------------|--------------------------|
| Normal-vs-Gleason score 6           | 2.02229999999304E-05     |
| Normal-vs-Gleason score 7           | 4.15190000000454E-05     |
| Normal-vs-Gleason score 8           | 2.22909999999521E-05     |
| Normal-vs-Gleason score 9           | 2.98629999950784E-07     |
| Normal-vs-Gleason score 10          | 1.608620E-01             |
| Gleason score 6-vs-Gleason score 7  | 4.061000E-01             |
| Gleason score 6-vs-Gleason score 8  | 9.377600E-01             |
| Gleason score 6-vs-Gleason score 9  | 1.608000E-01             |
| Gleason score 6-vs-Gleason score 10 | 9.559200E-01             |
| Gleason score 7-vs-Gleason score 8  | 5.001600E-01             |
| Gleason score 7-vs-Gleason score 9  | 5.080600E-03             |
| Gleason score 7-vs-Gleason score 10 | 7.586800E-01             |
| Gleason score 8-vs-Gleason score 9  | 1.509020E-01             |
| Gleason score 8-vs-Gleason score 10 | 9.454200E-01             |
| Gleason score 9-vs-Gleason score 10 | 7.797400E-01             |

**Panel 2. *PTEN* expression in BRCA.**

**A.**

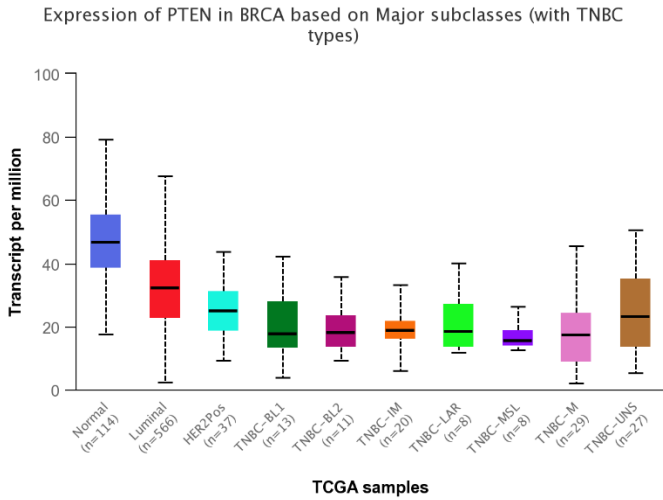

| Comparison          | Statistical significance |
|---------------------|--------------------------|
| Normal-vs-Luminal   | 1.62447832963153E-12     |
| Normal-vs-HER2Pos   | 5.48240342013173E-11     |
| Normal-vs-TNBC-BL1  | 6.36160000011543E-07     |
| Normal-vs-TNBC-BL2  | 2.9170000043527E-07      |
| Normal-vs-TNBC-IM   | 1.16979981257259E-10     |
| Normal-vs-TNBC-LAR  | 1.51167999999924E-05     |
| Normal-vs-TNBC-MSL  | 2.72050000005297E-06     |
| Normal-vs-TNBC-M    | 1.11022302462516E-16     |
| Normal-vs-TNBC-UNS  | 3.50299789175779E-11     |
| Luminal-vs-HER2Pos  | 1.976090E-02             |
| Luminal-vs-TNBC-BL1 | 1.498040E-02             |
| Luminal-vs-TNBC-BL2 | 5.460100E-03             |
| Luminal-vs-TNBC-IM  | 3.169500E-04             |
| Luminal-vs-TNBC-LAR | 1.368160E-02             |
| Luminal-vs-TNBC-MSL | 8.083700E-03             |
| Luminal-vs-TNBC-M   | 1.04239999965117E-08     |
| Luminal-vs-TNBC-UNS | 1.118060E-03             |

**B.**

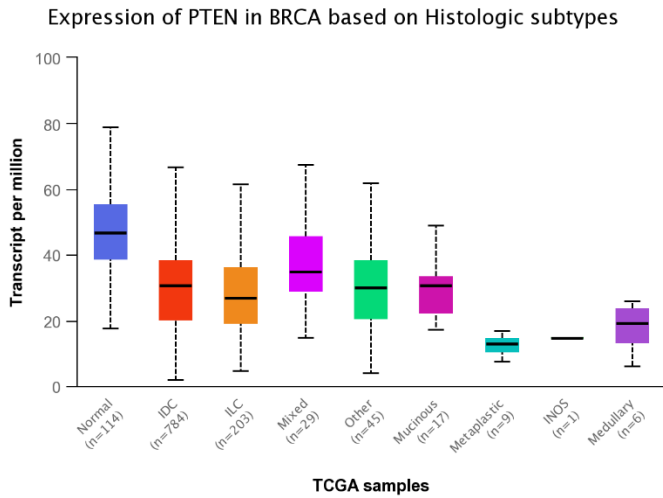

| Comparison            | Statistical significance |
|-----------------------|--------------------------|
| Normal-vs-IDC         | 1.62447832963153E-12     |
| Normal-vs-ILC         | <1E-12                   |
| Normal-vs-Mixed       | 2.615800E-03             |
| Normal-vs-Other       | 5.46684919555673E-12     |
| Normal-vs-Mucinous    | 1.559850E-03             |
| Normal-vs-Metaplastic | 1.43700000010405E-07     |
| Normal-vs-INOS        | N/A                      |
| Normal-vs-Medullary   | 1.76211999999287E-05     |
| IDC-vs-ILC            | 3.972400E-01             |
| IDC-vs-Mixed          | 4.118300E-03             |
| IDC-vs-Other          | 8.517800E-01             |
| IDC-vs-Mucinous       | 2.557400E-01             |
| IDC-vs-Metaplastic    | 6.502400E-03             |
| IDC-vs-INOS           | N/A                      |
| IDC-vs-Medullary      | 2.427900E-02             |
| ILC-vs-Mixed          | 4.015800E-03             |
| ILC-vs-Other          | 8.182200E-01             |
| ILC-vs-Mucinous       | 2.026000E-01             |

C.

Expression of PTEN in BRCA based on Menopause status

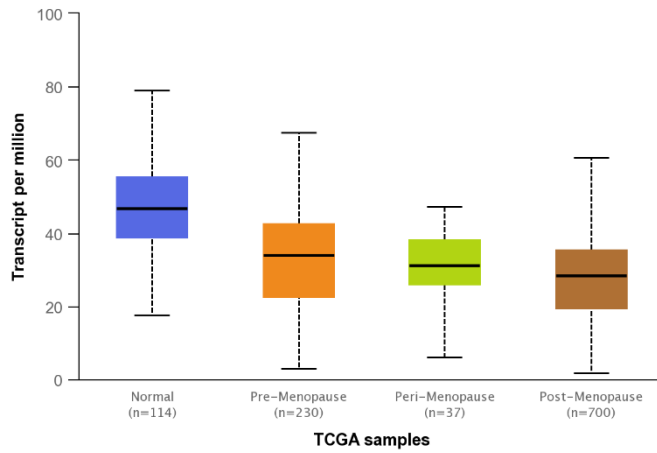

| Comparison                       | Statistical significance |
|----------------------------------|--------------------------|
| Normal-vs-Pre-Menopause          | 1.62803104331033E-12     |
| Normal-vs-Peri-Menopause         | 1.07570000018598E-07     |
| Normal-vs-Post-Menopause         | <1E-12                   |
| Pre-Menopause-vs-Peri-Menopause  | 5.897800E-01             |
| Pre-Menopause-vs-Post-Menopause  | 2.645200E-04             |
| Peri-Menopause-vs-Post-Menopause | 2.352200E-01             |

D

Expression of PTEN in BRCA based on breast cancer subclasses

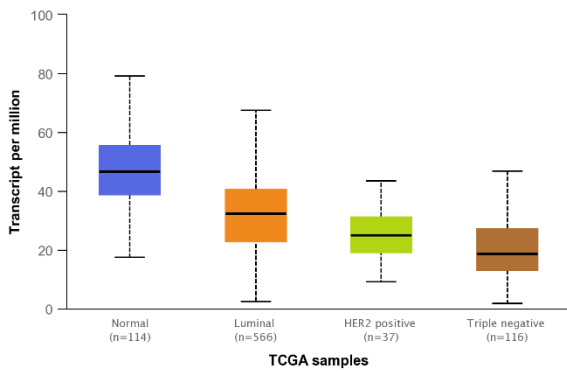

| Comparison               | Statistical significance |
|--------------------------|--------------------------|
| Normal-vs-Luminal        | 1.62447832963153E-12     |
| Normal-vs-HER2 Positive  | 5.48240342013173E-11     |
| Normal-vs-TNBC           | 1.62436730732907E-12     |
| Luminal-vs-HER2 Positive | 1.976090E-02             |
| Luminal-vs-TNBC          | 4.44089209850063E-16     |
| HER2 Positive-vs-TNBC    | 1.192010E-02             |

E.

Expression of PTEN in MET500 BRCA based on MYC amplification status

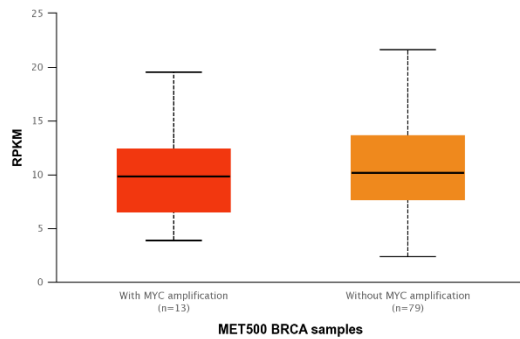

| Comparison                                   | Statistical significance |
|----------------------------------------------|--------------------------|
| MYC-amplification(+) vs MYC-amplification(-) | 4.306800E-01             |

Expression of PTEN in MET500 BRCA based on CCND1 amplification status

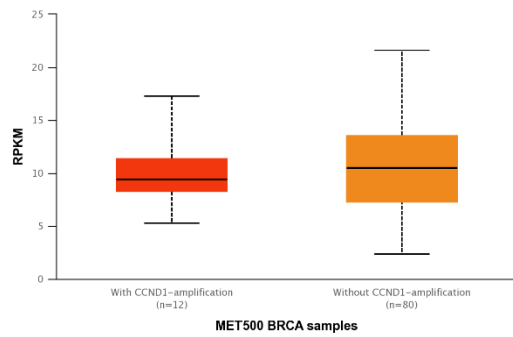

| Comparison                                       | Statistical significance |
|--------------------------------------------------|--------------------------|
| CCND1-amplification(+) vs CCND1-amplification(-) | 7.323400E-01             |

Expression of PTEN in MET500 BRCA based on ERBB2 amplification status

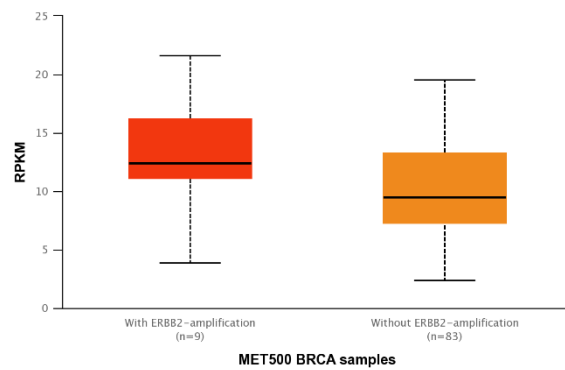

| Comparison                                       | Statistical significance |
|--------------------------------------------------|--------------------------|
| ERBB2-amplification(+) vs ERBB2-amplification(-) | 1.146360E-01             |

### Panel 3. *PTEN* expression in digestive system tumours

A.

Expression of *PTEN* in COAD based on histological subtypes

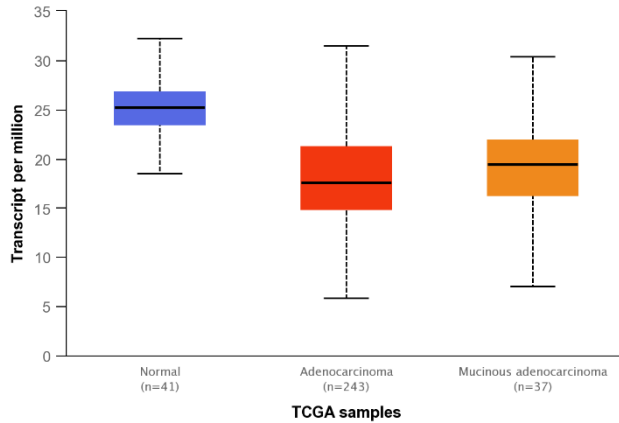

| Comparison                                | Statistical significance |
|-------------------------------------------|--------------------------|
| Normal-vs-Adenocarcinoma                  | 5.21804821573824E-15     |
| Normal-vs-Mucinous-adenocarcinoma         | 2.417200E-04             |
| Adenocarcinoma-vs-Mucinous-adenocarcinoma | 1.057010E-01             |

B.

Expression of *PTEN* in PAAD based on Diabetes status

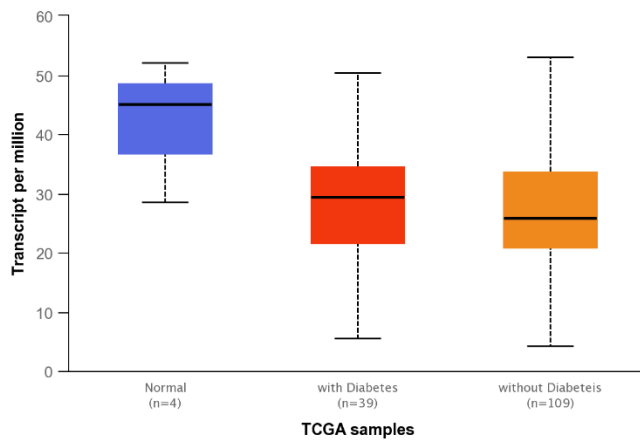

| Comparison              | Statistical significance |
|-------------------------|--------------------------|
| Normal-vs-Diabetic      | 4.723500E-02             |
| Normal-vs-NonDiabetic   | 7.536300E-02             |
| Diabetic-vs-NonDiabetic | 9.665800E-01             |

C.

Expression of *PTEN* in PAAD based on Pancreatitis status

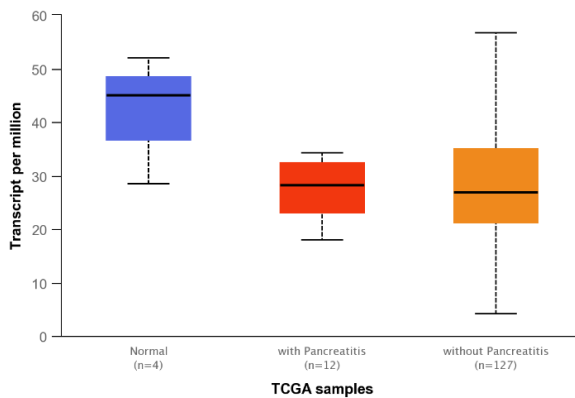

| Comparison                     | Statistical significance |
|--------------------------------|--------------------------|
| Normal-vs-Pancreatitis         | 6.936200E-03             |
| Normal-vs-NoPancreatitis       | 9.007700E-02             |
| Pancreatitis-vs-NoPancreatitis | 2.587200E-01             |

D.

Expression of PTEN in PAAD based on tumor grade

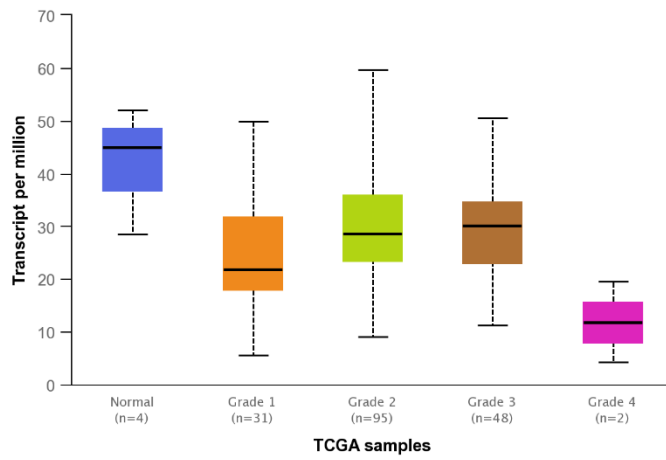

| Comparison         | Statistical significance |
|--------------------|--------------------------|
| Normal-vs-Grade 1  | 9.776400E-02             |
| Normal-vs-Grade 2  | 2.255700E-02             |
| Normal-vs-Grade 3  | 3.340500E-02             |
| Normal-vs-Grade 4  | 1.000000E+00             |
| Grade 1-vs-Grade 2 | 1.077520E-02             |
| Grade 1-vs-Grade 3 | 3.698100E-02             |
| Grade 1-vs-Grade 4 | 9.776400E-02             |
| Grade 2-vs-Grade 3 | 7.987200E-01             |
| Grade 2-vs-Grade 4 | 2.255700E-02             |
| Grade 3-vs-Grade 4 | 3.340500E-02             |

E.

Expression of PTEN in PAAD based on patient's drinking habits

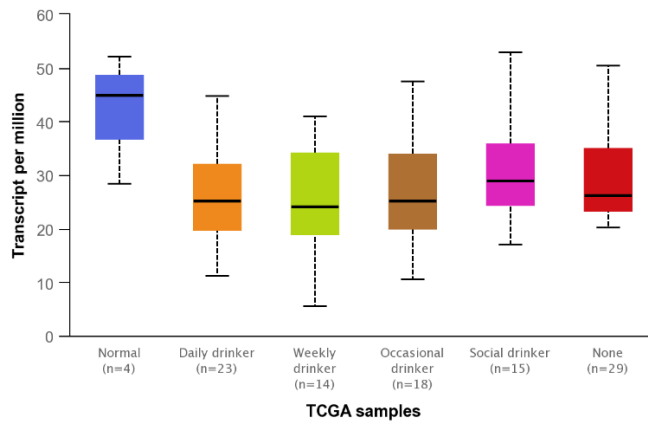

| Comparison                           | Statistical significance |
|--------------------------------------|--------------------------|
| Normal-vs-Non Drinker                | 3.478100E-02             |
| Normal-vs-Daily Drinker              | 1.138320E-02             |
| Normal-vs-Weekly Drinker             | 6.411900E-02             |
| Normal-vs-Occasional Drinker         | 1.875950E-01             |
| Normal-vs-Social Drinker             | 2.118200E-01             |
| Non Drinker-vs-Daily Drinker         | 6.827400E-01             |
| Non Drinker-vs-Weekly Drinker        | 8.573400E-01             |
| Non Drinker-vs-Occasional Drinker    | 1.255560E-01             |
| Non Drinker-vs-Social Drinker        | 1.809780E-01             |
| Daily Drinker-vs-Weekly Drinker      | 5.915400E-01             |
| Daily Drinker-vs-Occasional Drinker  | 5.526500E-02             |
| Daily Drinker-vs-Social Drinker      | 8.935700E-02             |
| Weekly Drinker-vs-Occasional Drinker | 2.617200E-01             |
| Weekly Drinker-vs-Social Drinker     | 3.301400E-01             |
| Occasional Drinker-vs-Social Drinker | 9.464600E-01             |

## Panel 4. *PTEN* expression in lung tumours

A.

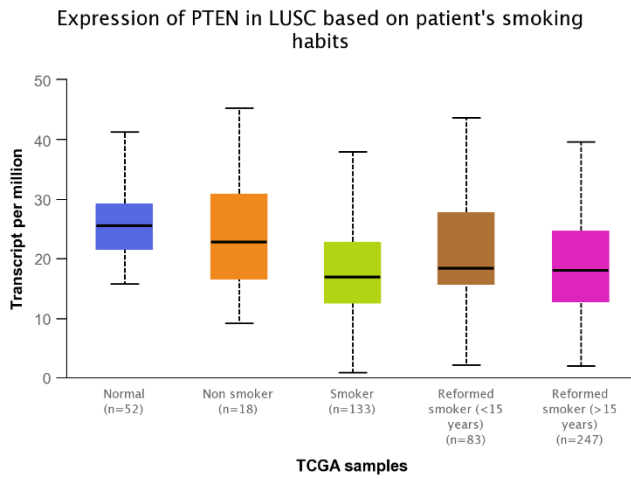

| Comparison                                  | Statistical significance    |
|---------------------------------------------|-----------------------------|
| Normal-vs-Non smoker                        | 2.880400E-01                |
| <b>Normal-vs-Smoker</b>                     | <b>7.93899945783494E-10</b> |
| <b>Normal-vs-Reformed smoker1</b>           | <b>1.357710E-03</b>         |
| <b>Normal-vs-Reformed smoker2</b>           | <b>1.14760001501679E-09</b> |
| <b>Non smoker-vs-Smoker</b>                 | <b>1.321950E-02</b>         |
| Non smoker-vs-Reformed smoker1              | 3.237000E-01                |
| <b>Non smoker-vs-Reformed smoker2</b>       | <b>2.163700E-02</b>         |
| <b>Smoker-vs-Reformed smoker1</b>           | <b>1.498170E-02</b>         |
| Smoker-vs-Reformed smoker2                  | 4.253600E-01                |
| <b>Reformed smoker1-vs-Reformed smoker2</b> | <b>3.316400E-02</b>         |

B.

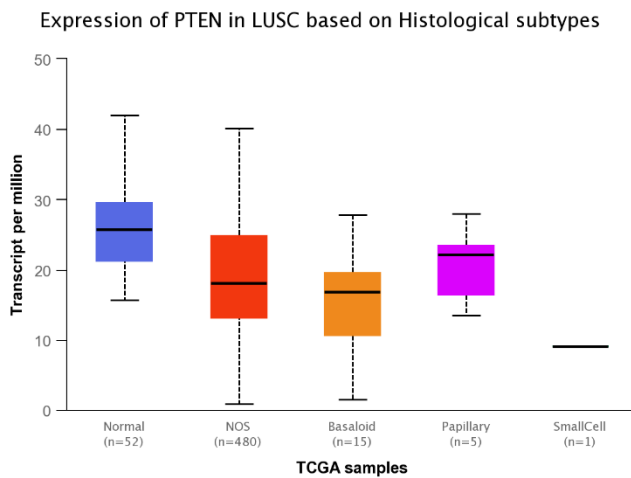

| Comparison                               | Statistical significance    |
|------------------------------------------|-----------------------------|
| <b>Normal-vs-NOS</b>                     | <b>3.28860000009534E-07</b> |
| <b>Normal-vs-Mixed</b>                   | <b>2.25279999999106E-05</b> |
| Normal-vs-ClearCell                      | 7.039600E-01                |
| Normal-vs-LBC-NonMucinous                | 1.753620E-01                |
| <b>Normal-vs-SolidPatternPredominant</b> | <b>2.15080000000034E-05</b> |
| Normal-vs-Acinar                         | 7.360000E-02                |
| Normal-vs-LBC-Mucinous                   | 4.171400E-01                |
| Normal-vs-Mucinous carcinoma             | 1.018830E-01                |
| <b>Normal-vs-Papillary</b>               | <b>2.202300E-03</b>         |
| Normal-vs-Mucinous                       | 2.100000E-01                |
| Normal-vs-Micropapillary                 | 1.317220E-01                |
| Normal-vs-SignetRing                     | N/A                         |
| NOS-vs-Mixed                             | 9.106400E-01                |
| NOS-vs-ClearCell                         | 9.952300E-02                |
| NOS-vs-LBC-NonMucinous                   | 2.291200E-01                |
| <b>NOS-vs-SolidPatternPredominant</b>    | <b>4.890300E-02</b>         |
| NOS-vs-Acinar                            | 7.176400E-01                |
| NOS-vs-LBC-Mucinous                      | 5.361800E-01                |

## Panel 5. PTEN expression in THYM, THCA and UCEC

A.

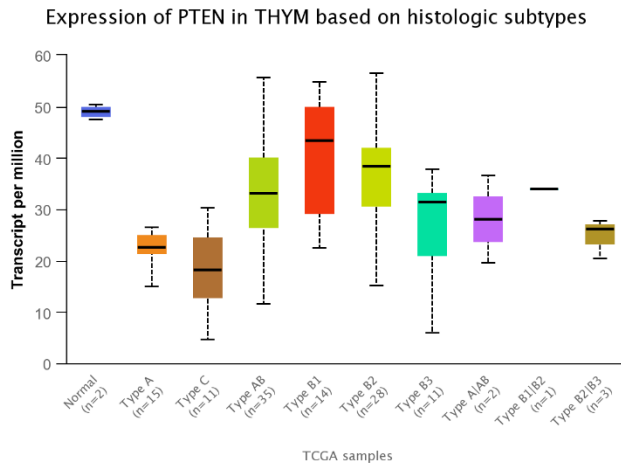

| Comparison           | Statistical significance |
|----------------------|--------------------------|
| Normal-VS-Type A     | 3.009700E-04             |
| Normal-VS-Type C     | 7.660200E-03             |
| Normal-VS-Type AB    | 2.788500E-02             |
| Normal-VS-Type B1    | 3.242800E-01             |
| Normal-VS-Type B2    | 2.178400E-01             |
| Normal-VS-Type B3    | 1.371620E-02             |
| Normal-VS-Type A AB  | 1.374360E-01             |
| Normal-VS-Type B1 B2 | N/A                      |
| Normal-VS-Type B2 B3 | 4.322000E-03             |
| Type A-VS-Type C     | 3.113600E-01             |
| Type A-VS-Type AB    | 6.264300E-03             |
| Type A-VS-Type B1    | 1.985670E-04             |
| Type A-VS-Type B2    | 9.67560000000312E-05     |
| Type A-VS-Type B3    | 5.941200E-01             |
| Type A-VS-Type A AB  | 5.737400E-01             |
| Type A-VS-Type B1 B2 | N/A                      |
| Type A-VS-Type B2 B3 | 9.961000E-01             |

B.

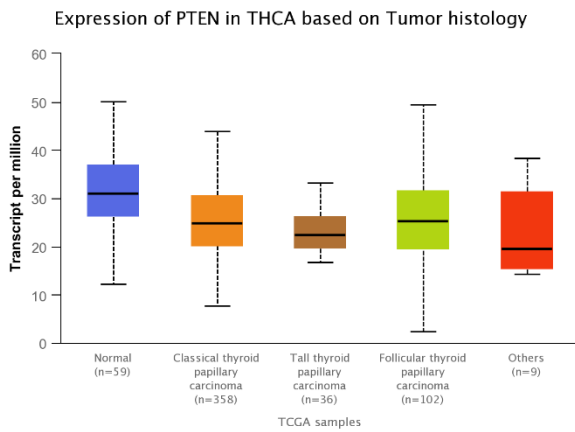

| Comparison              | Statistical significance |
|-------------------------|--------------------------|
| Classical-VS-Tall       | 1.707580E-01             |
| Classical-VS-Follicular | 5.553000E-01             |
| Classical-VS-Other      | 3.636200E-01             |
| Classical-VS-Normal     | 1.7453000156209E-09      |
| Tall-VS-Follicular      | 1.468420E-01             |
| Tall-VS-Other           | 8.401200E-01             |
| Tall-VS-Normal          | 5.91060000054711E-07     |
| Follicular-VS-Other     | 3.472200E-01             |
| Follicular-VS-Normal    | 3.97460000000072E-05     |
| Other-VS-Normal         | 7.364300E-03             |

C.

Expression of PTEN in UCEC based on Histological subtypes

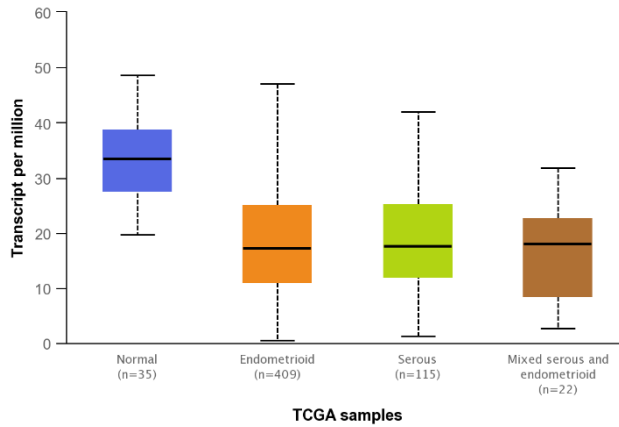

| Comparison                                    | Statistical significance |
|-----------------------------------------------|--------------------------|
| Normal-vs-Endometrioid                        | 2.31281660489913E-12     |
| Normal-vs-Serous                              | 1.62647673107585E-12     |
| Normal-vs-Mixed serous and endometrioid       | 2.35810038162754E-10     |
| Endometrioid -vs-Serous                       | 3.974400E-01             |
| Endometrioid-vs-Mixed serous and endometrioid | 2.361000E-01             |
| Serous-vs-Mixed serous and endometrioid       | 3.262800E-01             |

D.

Expression of PTEN in UCEC based on Menopause status

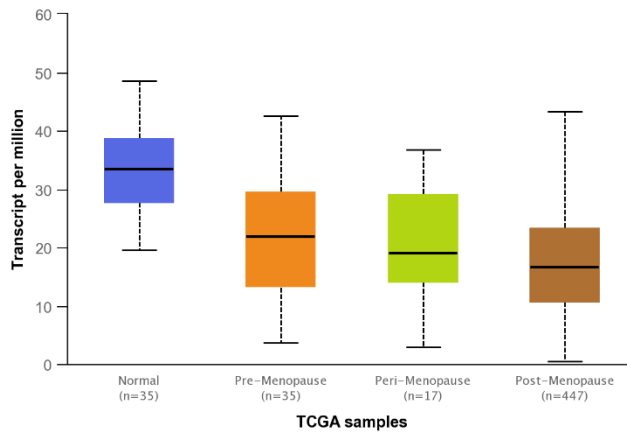

| Comparison                       | Statistical significance |
|----------------------------------|--------------------------|
| Normal-vs-Pre-Menopause          | 1.26190000004911E-06     |
| Normal-vs-Peri-Menopause         | 6.59450000051187E-07     |
| Normal-vs-Post-Menopause         | 1.84718906837134E-12     |
| Pre-Menopause-vs-Peri-Menopause  | 4.383000E-01             |
| Pre-Menopause-vs-Post-Menopause  | 1.226630E-01             |
| Peri-Menopause-vs-Post-Menopause | 8.535400E-01             |
