# Supplementary material for: Comprehensive biological information analysis of PTEN gene in pan-cancer
Source: Research Square preprint supplement (doi:10.21203/rs.3.rs-388887/v1), 2021-04-12
Supplement: Supplementary file 4 [file Figure S3-Target genes expression across pathological stages.pdf › Supplementary Material/Figure S3-Target genes expression across pathological stages.pdf]

## PTENP1

Expression of PTENP1 in BLCA based on individual cancer stages

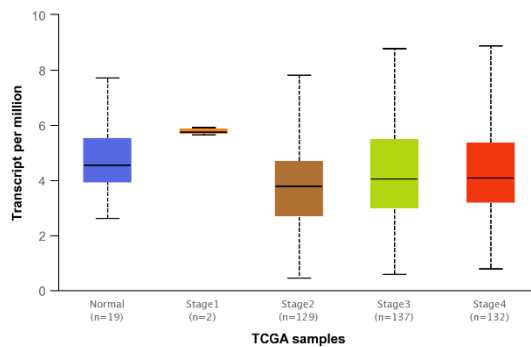

### Comparison p-Value

**N-vs-St1** 5.190400E-01  
**N-vs-St2** 1.157840E-02  
**N-vs-St3** 2.071800E-01  
**N-vs-St4** 4.003000E-01  
**St1-vs-St2** 1.215010E-01  
**St1-vs-St3** 3.308000E-01  
**St1-vs-St4** 4.247600E-01  
**St2-vs-St3** 5.543900E-02  
**St2-vs-St4** 8.835800E-03  
**St3-vs-St4** 4.580600E-01

Expression of PTENP1 in BRCA based on individual cancer stages

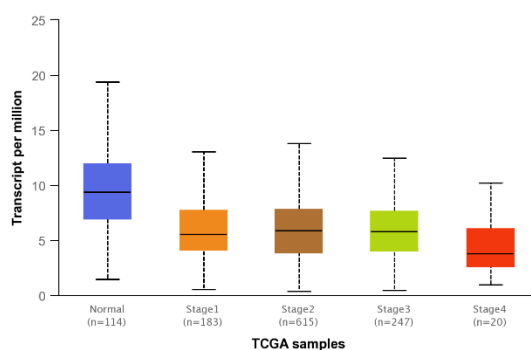

**N-vs-St1** 4.74065231514942E-14  
**N-vs-St2** 1.4432899320127E-15  
**N-vs-St3** 1.62481139653892E-12  
**N-vs-St4** 4.40240000000314E-05  
**St1-vs-St2** 8.312000E-01  
**St1-vs-St3** 4.196000E-01  
**St1-vs-St4** 4.045600E-01  
**St2-vs-St3** 4.285600E-01  
**St2-vs-St4** 4.323800E-01  
**St3-vs-St4** 6.762400E-01

Expression of PTENP1 in COAD based on individual cancer stages

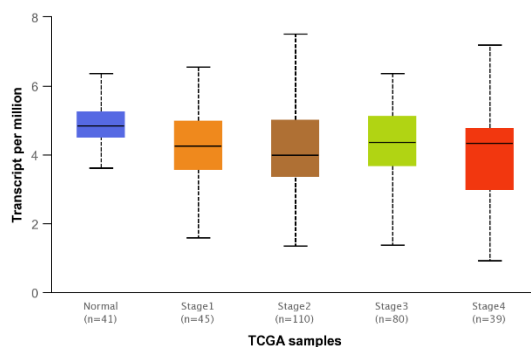

**N-vs-St1** 1.642240E-01  
**N-vs-St2** 3.615600E-04  
**N-vs-St3** 6.301200E-03  
**N-vs-St4** 1.615530E-02  
**St1-vs-St2** 5.127600E-01  
**St1-vs-St3** 7.941400E-01  
**St1-vs-St4** 6.176200E-01  
**St2-vs-St3** 5.323400E-01  
**St2-vs-St4** 9.180000E-01  
**St3-vs-St4** 7.088400E-01

Expression of PTENP1 in KICH based on individual cancer stages

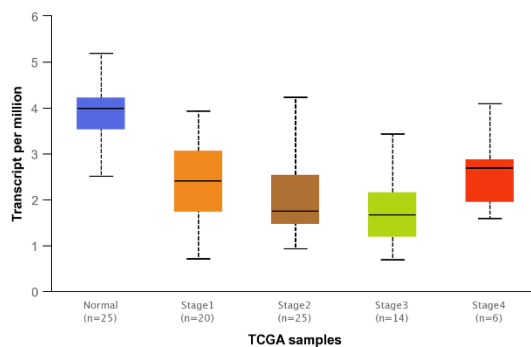

**N-vs-St1** 7.10450000052099E-07  
**N-vs-St2** 3.30700000050754E-07  
**N-vs-St3** 2.47779999962283E-07  
**N-vs-St4** 9.103400E-01  
**St1-vs-St2** 8.294200E-01  
**St1-vs-St3** 3.600800E-01  
**St1-vs-St4** 2.981000E-01  
**St2-vs-St3** 4.907000E-01  
**St2-vs-St4** 2.820400E-01  
**St3-vs-St4** 2.316400E-01

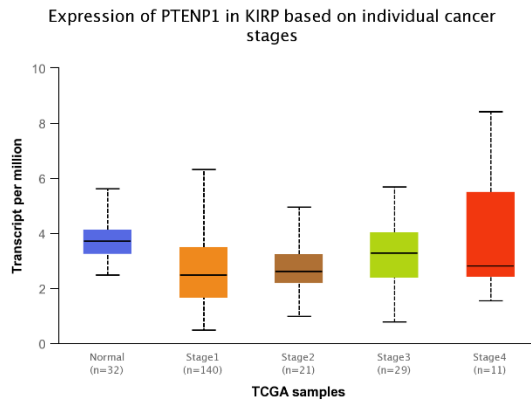

**N-vs-St1** 8.3602000000159E-05  
**N-vs-St2** 2.287500E-02  
**N-vs-St3** 1.367430E-01  
**N-vs-St4** 8.572800E-01  
**St1-vs-St2** 5.578400E-01  
**St1-vs-St3** 1.214760E-01  
**St1-vs-St4** 7.980100E-02  
**St2-vs-St3** 4.917400E-01  
**St2-vs-St4** 2.642000E-01  
**St3-vs-St4** 5.078400E-01

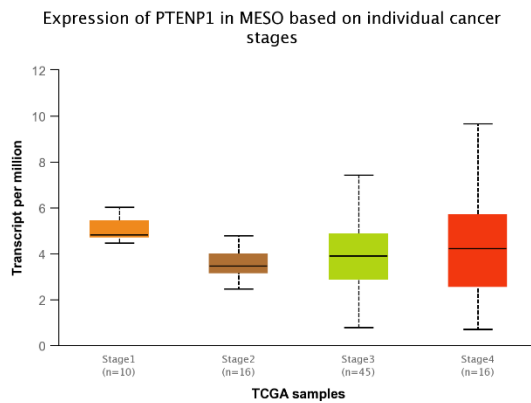

**St1-vs-St2** 2.901800E-02  
**St1-vs-St3** 9.670200E-02  
**St1-vs-St4** 4.603000E-01  
**St2-vs-St3** 4.564800E-01  
**St2-vs-St4** 4.888000E-01  
**St3-vs-St4** 8.358400E-01

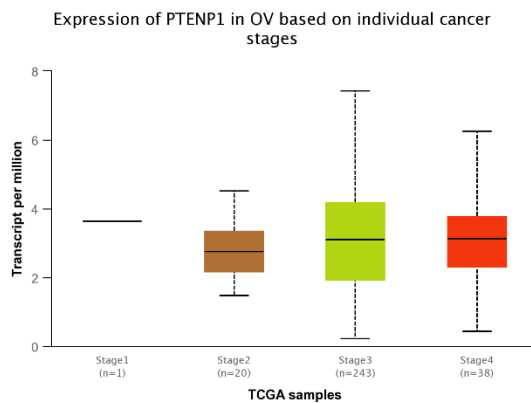

**St1-vs-St2** N/A  
**St1-vs-St3** N/A  
**St1-vs-St4** N/A  
**St2-vs-St3** 2.101700E-02  
**St2-vs-St4** 1.045960E-01  
**St3-vs-St4** 9.615000E-01

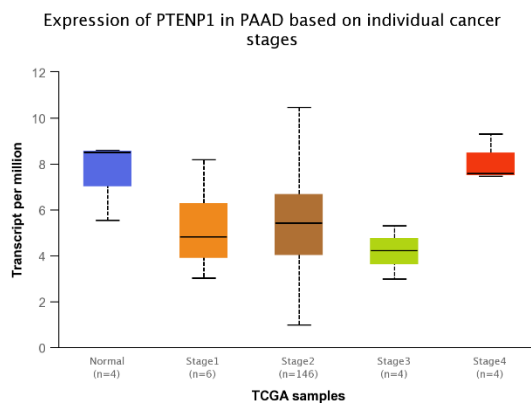

**N-vs-St1** 1.183980E-01  
**N-vs-St2** 1.856960E-01  
**N-vs-St3** 2.132300E-02  
**N-vs-St4** 6.928200E-01  
**St1-vs-St2** 5.845400E-01  
**St1-vs-St3** 3.549000E-01  
**St1-vs-St4** 3.283600E-01  
**St2-vs-St3** 1.860380E-01  
**St2-vs-St4** 3.931800E-01  
**St3-vs-St4** 1.380360E-01

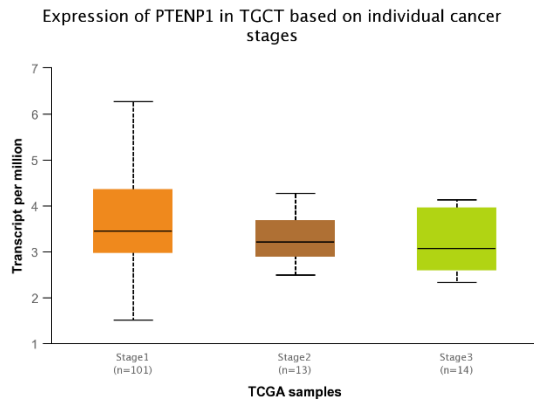

St1-vs-St2 1.908780E-01  
 St1-vs-St3 2.287700E-02  
 St2-vs-St3 4.314400E-01

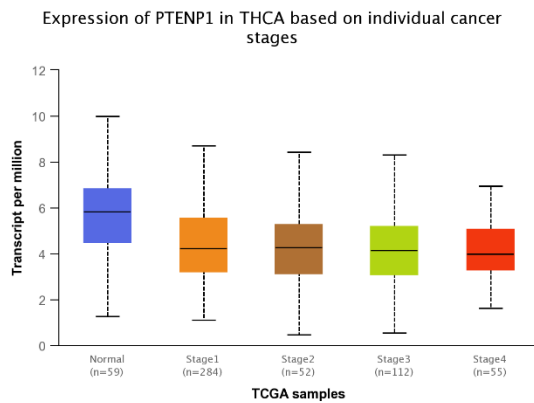

N-vs-St1 1.7702999992584E-07  
 N-vs-St2 6.2773000000016E-05  
 N-vs-St3 4.16640000278079E-08  
 N-vs-St4 2.0266999999072E-05  
 St1-vs-St2 6.396200E-01  
 St1-vs-St3 2.136600E-01  
 St1-vs-St4 6.427200E-01  
 St2-vs-St3 6.891600E-01  
 St2-vs-St4 9.847200E-01  
 St3-vs-St4 6.536400E-01

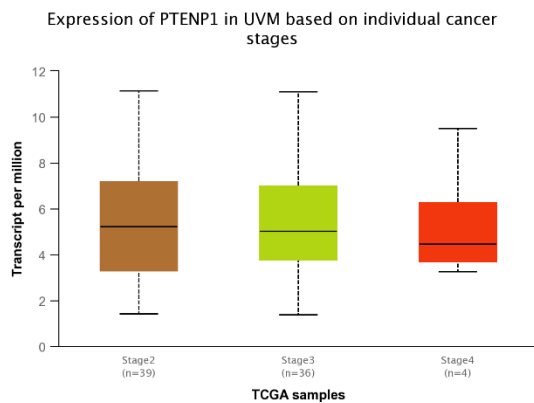

St2-vs-St3 6.131600E-01  
 St2-vs-St4 8.309400E-01  
 St3-vs-St4 <1E-12

## CREB1

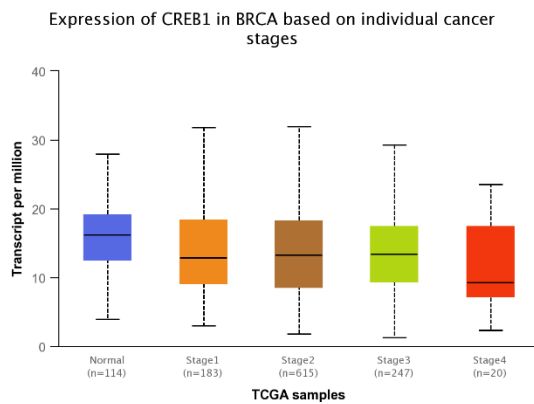

N-vs-St1 5.643600E-03  
 N-vs-St2 1.367380E-04  
 N-vs-St3 1.896040E-03  
 N-vs-St4 2.477400E-03  
 St1-vs-St2 6.248800E-01  
 St1-vs-St3 8.431000E-01  
 St1-vs-St4 1.523840E-01  
 St2-vs-St3 7.758400E-01  
 St2-vs-St4 1.946780E-01  
 St3-vs-St4 1.842180E-01

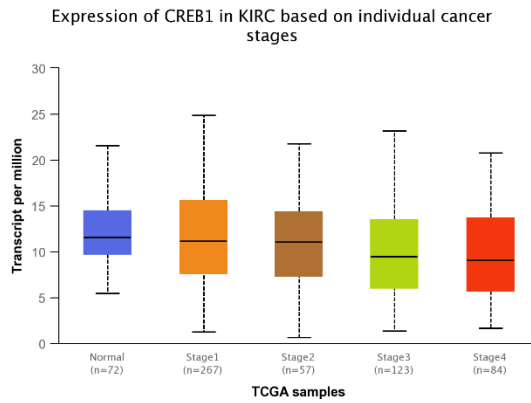

**N-vs-St1** 8.155700E-02  
**N-vs-St2** 2.001600E-01  
**N-vs-St3** 4.807300E-04  
**N-vs-St4** 5.59169999999609E-05  
**St1-vs-St2** 7.708400E-01  
**St1-vs-St3** 1.629820E-02  
**St1-vs-St4** 3.180700E-03  
**St2-vs-St3** 2.021600E-01  
**St2-vs-St4** 9.064000E-02  
**St3-vs-St4** 4.668800E-01

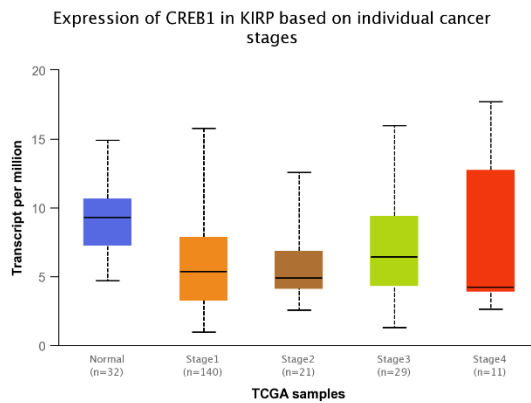

**N-vs-St1** 1.88250999999529E-05  
**N-vs-St2** 1.117640E-01  
**N-vs-St3** 4.759800E-01  
**N-vs-St4** 4.477200E-01  
**St1-vs-St2** 3.640800E-01  
**St1-vs-St3** 1.203550E-01  
**St1-vs-St4** 3.033200E-01  
**St2-vs-St3** 5.478800E-01  
**St2-vs-St4** 7.882800E-01  
**St3-vs-St4** 8.267000E-01

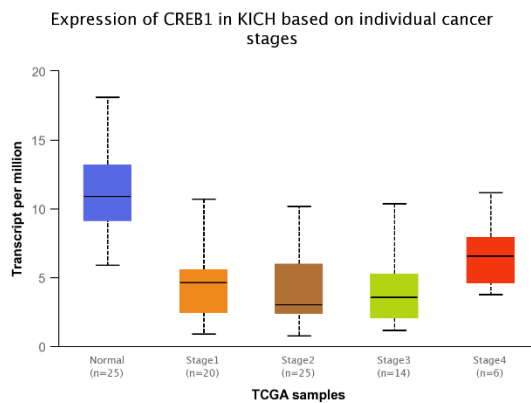

**N-vs-St1** 6.38139996400611E-09  
**N-vs-St2** 1.64899982557642E-10  
**N-vs-St3** 7.79760000013674E-07  
**N-vs-St4** 2.835800E-03  
**St1-vs-St2** 7.304400E-01  
**St1-vs-St3** 9.492800E-01  
**St1-vs-St4** 1.771020E-01  
**St2-vs-St3** 8.355600E-01  
**St2-vs-St4** 1.040220E-01  
**St3-vs-St4** 2.797200E-01

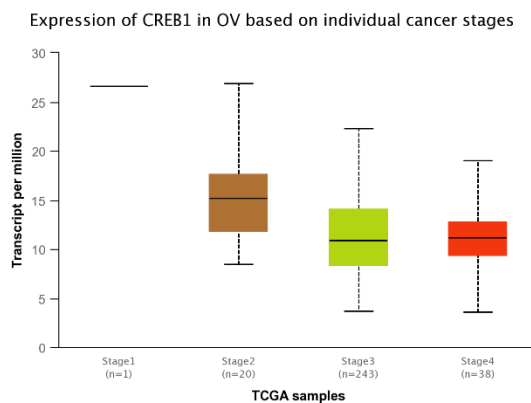

**St1-vs-St2** N/A  
**St1-vs-St3** N/A  
**St1-vs-St4** N/A  
**St2-vs-St3** 5.51959999999241E-05  
**St2-vs-St4** 1.540330E-03  
**St3-vs-St4** 8.270000E-01

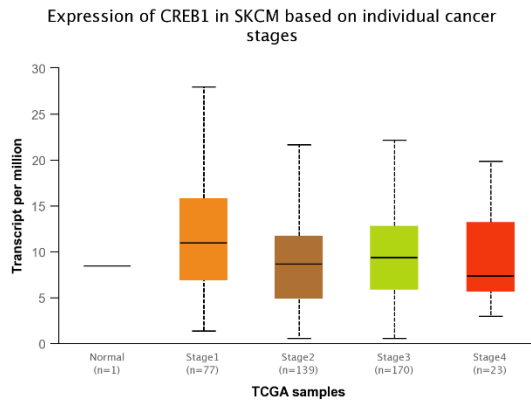

N-vs-St1 N/A  
N-vs-St2 N/A  
N-vs-St3 N/A  
N-vs-St4 N/A  
St1-vs-St2 6.363200E-04  
St1-vs-St3 9.800200E-03  
St1-vs-St4 1.045950E-01  
St2-vs-St3 2.401600E-01  
St2-vs-St4 6.787600E-01  
St3-vs-St4 8.465000E-01

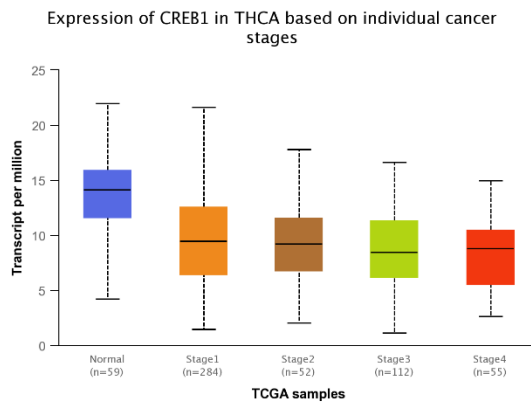

N-vs-St1 5.89960003072321E-09  
N-vs-St2 8.0526000001413E-07  
N-vs-St3 7.33190175239429E-11  
N-vs-St4 2.27559970866764E-10  
St1-vs-St2 5.632600E-01  
St1-vs-St3 6.741600E-02  
St1-vs-St4 1.207810E-02  
St2-vs-St3 4.578600E-01  
St2-vs-St4 1.829960E-01  
St3-vs-St4 4.733400E-01

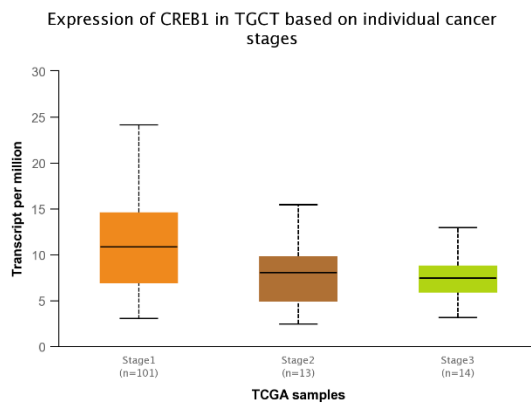

St1-vs-St2 4.262300E-02  
St1-vs-St3 2.357000E-01  
St2-vs-St3 4.762800E-01

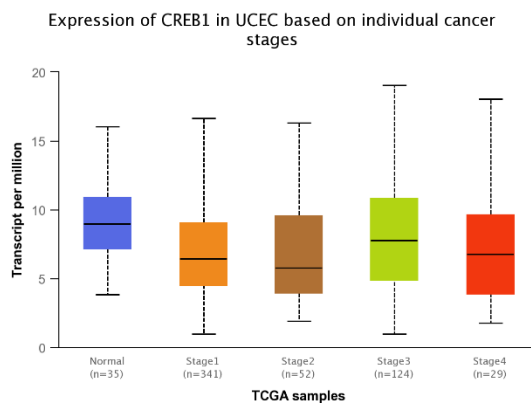

N-vs-St1 1.145990E-02  
N-vs-St2 3.308400E-02  
N-vs-St3 2.042600E-01  
N-vs-St4 5.688400E-02  
St1-vs-St2 9.623800E-01  
St1-vs-St3 2.656100E-02  
St1-vs-St4 9.715000E-01  
St2-vs-St3 2.029400E-01  
St2-vs-St4 9.564400E-01  
St3-vs-St4 2.748000E-01

## **PBRM1**

Expression of PBRM1 in BRCA based on individual cancer stages

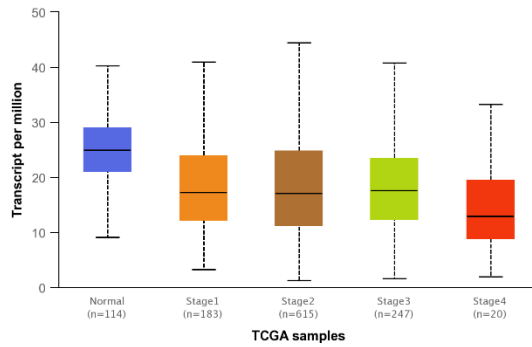

**N-vs-St1** 4.41859999700256E-08  
**N-vs-St2** 2.32990293724811E-11  
**N-vs-St3** 1.17200000038231E-07  
**N-vs-St4** 2.81040000049693E-07  
**St1-vs-St2** 7.687400E-01  
**St1-vs-St3** 7.046800E-01  
**St1-vs-St4** 4.709900E-02  
**St2-vs-St3** 4.189800E-01  
**St2-vs-St4** 6.434200E-02  
**St3-vs-St4** 4.395900E-02

Expression of PBRM1 in THCA based on individual cancer stages

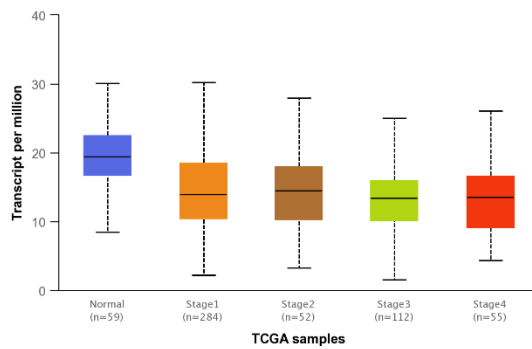

**N-vs-St1** 9.73480000054927E-07  
**N-vs-St2** 9.55059999999675E-05  
**N-vs-St3** 2.71279998464991E-09  
**N-vs-St4** 3.75709999778095E-08  
**St1-vs-St2** 8.214600E-01  
**St1-vs-St3** 7.527600E-02  
**St1-vs-St4** 6.446000E-02  
**St2-vs-St3** 3.308800E-01  
**St2-vs-St4** 2.618200E-01  
**St3-vs-St4** 7.535800E-01

Expression of PBRM1 in READ based on individual cancer stages

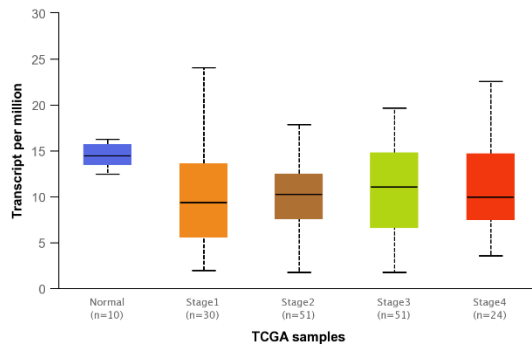

**N-vs-St1** 5.374300E-02  
**N-vs-St2** 6.215900E-03  
**N-vs-St3** 1.413810E-02  
**N-vs-St4** 5.489600E-02  
**St1-vs-St2** 8.744800E-01  
**St1-vs-St3** 8.577800E-01  
**St1-vs-St4** 7.336800E-01  
**St2-vs-St3** 9.842800E-01  
**St2-vs-St4** 7.581800E-01  
**St3-vs-St4** 7.888000E-01

Expression of PBRM1 in PAAD based on individual cancer stages

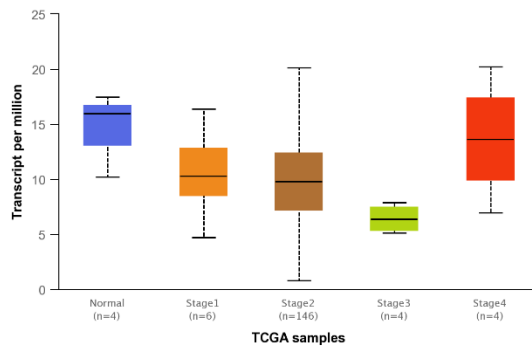

**N-vs-St1** 1.985630E-01  
**N-vs-St2** 8.728400E-02  
**N-vs-St3** 1.024020E-02  
**N-vs-St4** 8.251600E-01  
**St1-vs-St2** 8.705800E-01  
**St1-vs-St3** 9.425600E-02  
**St1-vs-St4** 3.473400E-01  
**St2-vs-St3** 8.166100E-02  
**St2-vs-St4** 1.243600E-01  
**St3-vs-St4** 9.692300E-02

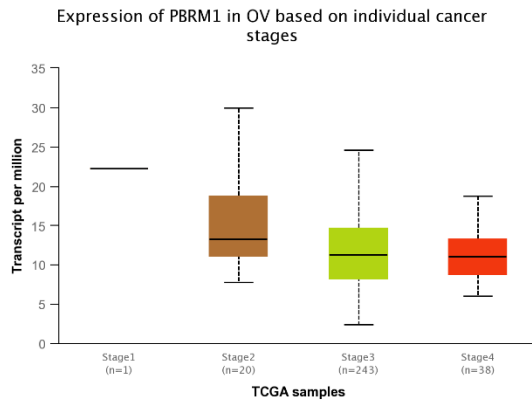

St1-vs-St2 N/A  
 St1-vs-St3 N/A  
 St1-vs-St4 N/A  
 St2-vs-St3 2.177900E-02  
 St2-vs-St4 5.716400E-03  
 St3-vs-St4 4.732100E-02

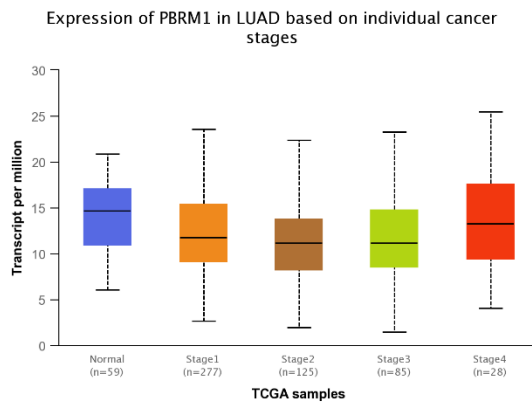

N-vs-St1 1.100470E-02  
 N-vs-St2 1.462400E-02  
 N-vs-St3 2.496200E-02  
 N-vs-St4 2.727600E-01  
 St1-vs-St2 7.001400E-01  
 St1-vs-St3 7.723200E-01  
 St1-vs-St4 6.700000E-01  
 St2-vs-St3 9.647400E-01  
 St2-vs-St4 5.694600E-01  
 St3-vs-St4 5.823000E-01

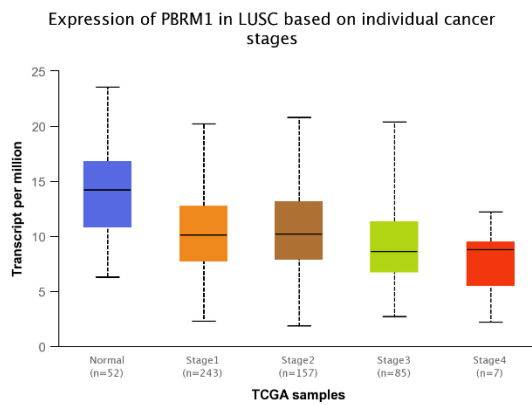

N-vs-St1 1.70529999998781E-06  
 N-vs-St2 3.73049999999875E-05  
 N-vs-St3 2.72550000002258E-06  
 N-vs-St4 1.582930E-04  
 St1-vs-St2 6.227200E-01  
 St1-vs-St3 3.375200E-01  
 St1-vs-St4 6.486300E-02  
 St2-vs-St3 2.183200E-01  
 St2-vs-St4 5.053600E-02  
 St3-vs-St4 2.037800E-01

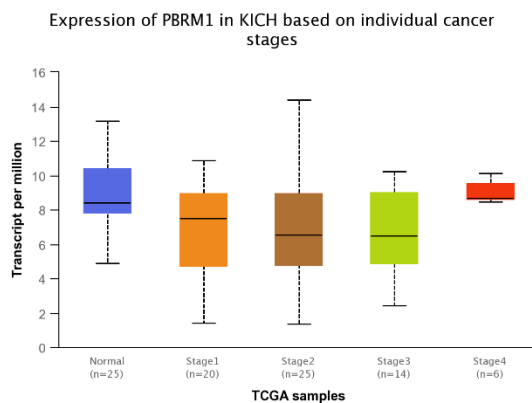

N-vs-St1 2.796000E-02  
 N-vs-St2 1.783240E-01  
 N-vs-St3 2.580100E-02  
 N-vs-St4 7.739800E-01  
 St1-vs-St2 5.777000E-01  
 St1-vs-St3 8.671000E-01  
 St1-vs-St4 2.227400E-01  
 St2-vs-St3 5.261000E-01  
 St2-vs-St4 5.603400E-01  
 St3-vs-St4 1.583010E-01

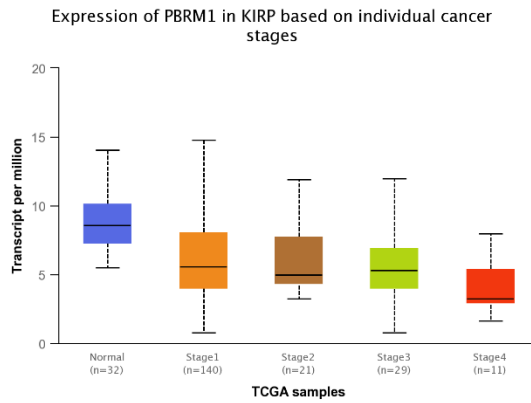

**N-vs-St1** 1.002330E-04  
**N-vs-St2** 4.689800E-02  
**N-vs-St3** 9.248400E-04  
**N-vs-St4** 4.9128999979331E-08  
**St1-vs-St2** 7.853200E-01  
**St1-vs-St3** 5.138600E-01  
**St1-vs-St4** 7.175300E-04  
**St2-vs-St3** 4.565000E-01  
**St2-vs-St4** 5.236100E-03  
**St3-vs-St4** 4.485800E-02

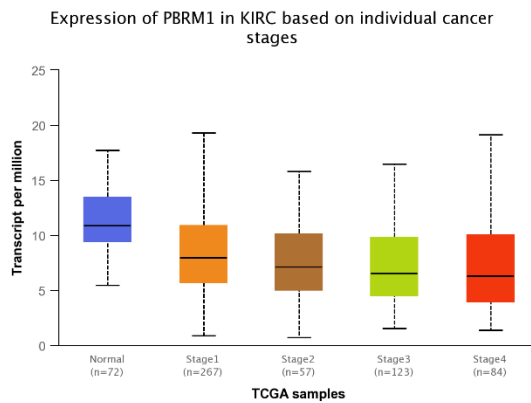

**N-vs-St1** 9.65669999963836E-07  
**N-vs-St2** 1.66658999999347E-05  
**N-vs-St3** 1.56089585701125E-11  
**N-vs-St4** 1.60089996814605E-09  
**St1-vs-St2** 2.278600E-01  
**St1-vs-St3** 7.6371999999912E-05  
**St1-vs-St4** 5.218600E-03  
**St2-vs-St3** 1.904600E-01  
**St2-vs-St4** 3.170800E-01  
**St3-vs-St4** 7.789800E-01

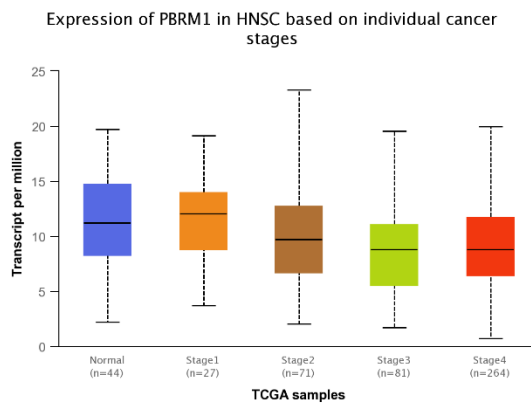

**N-vs-St1** 9.204400E-01  
**N-vs-St2** 4.102400E-01  
**N-vs-St3** 3.748200E-02  
**N-vs-St4** 1.614840E-01  
**St1-vs-St2** 4.178600E-01  
**St1-vs-St3** 6.158400E-02  
**St1-vs-St4** 9.994000E-02  
**St2-vs-St3** 1.475970E-01  
**St2-vs-St4** 4.977400E-01  
**St3-vs-St4** 3.061200E-01

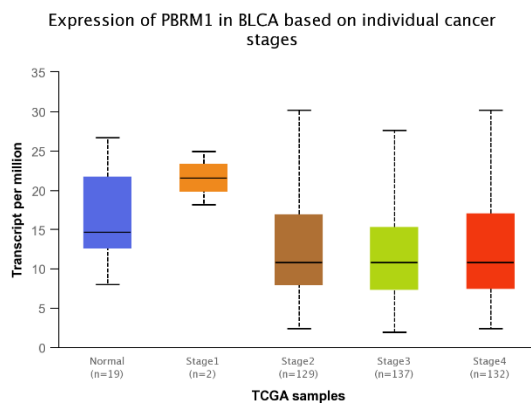

**N-vs-St1** 2.481800E-01  
**N-vs-St2** 6.720100E-02  
**N-vs-St3** 9.720900E-03  
**N-vs-St4** 2.716100E-02  
**St1-vs-St2** 1.039360E-01  
**St1-vs-St3** 4.102100E-02  
**St1-vs-St4** 6.710100E-02  
**St2-vs-St3** 3.279400E-01  
**St2-vs-St4** 6.087000E-01  
**St3-vs-St4** 6.425600E-01

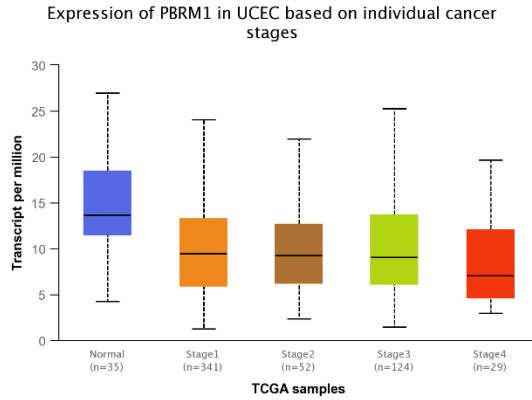

**N-vs-St1** 3.6091999997655E-06  
**N-vs-St2** 8.023400E-04  
**N-vs-St3** 1.86084000000086E-05  
**N-vs-St4** 1.9427999999877E-06  
**St1-vs-St2** 8.272200E-01  
**St1-vs-St3** 8.219200E-01  
**St1-vs-St4** 7.316300E-02  
**St2-vs-St3** 7.331000E-01  
**St2-vs-St4** 9.475800E-02  
**St3-vs-St4** 1.029590E-01

## HNRNPK

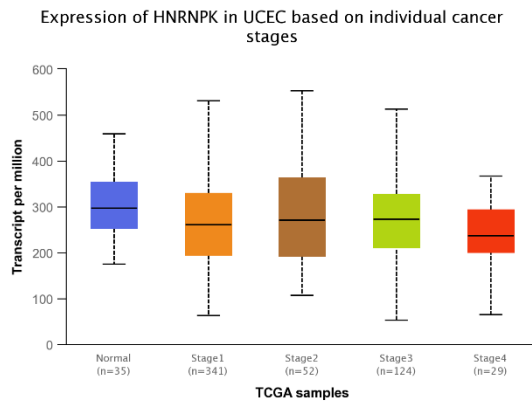

**N-vs-St1** 1.013850E-02  
**N-vs-St2** 3.942800E-01  
**N-vs-St3** 8.280000E-02  
**N-vs-St4** 1.180340E-03  
**St1-vs-St2** 2.862600E-01  
**St1-vs-St3** 4.413200E-01  
**St1-vs-St4** 8.395700E-02  
**St2-vs-St3** 6.325000E-01  
**St2-vs-St4** 4.812400E-02  
**St3-vs-St4** 8.428200E-02

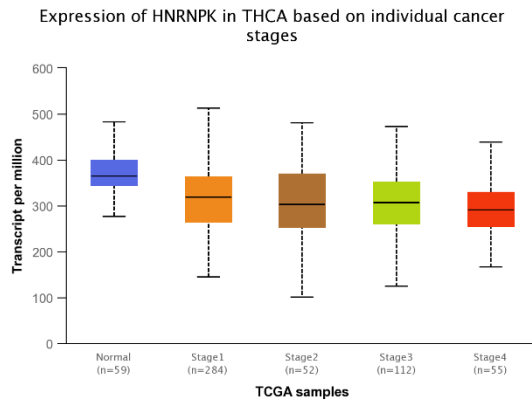

**N-vs-St1** 1.51697999999367E-05  
**N-vs-St2** 5.92769999999687E-05  
**N-vs-St3** 3.08040000174259E-08  
**N-vs-St4** 1.42389999790993E-08  
**St1-vs-St2** 4.136000E-01  
**St1-vs-St3** 7.741500E-02  
**St1-vs-St4** 2.866300E-02  
**St2-vs-St3** 6.722800E-01  
**St2-vs-St4** 4.415800E-01  
**St3-vs-St4** 6.334000E-01

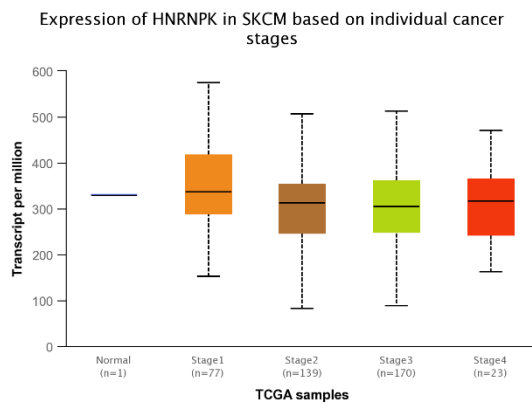

**N-vs-St1** N/A  
**N-vs-St2** N/A  
**N-vs-St3** N/A  
**N-vs-St4** N/A  
**St1-vs-St2** 4.462800E-03  
**St1-vs-St3** 8.401200E-04  
**St1-vs-St4** 8.642000E-02  
**St2-vs-St3** 8.045800E-01  
**St2-vs-St4** 8.693000E-01  
**St3-vs-St4** 7.525800E-01

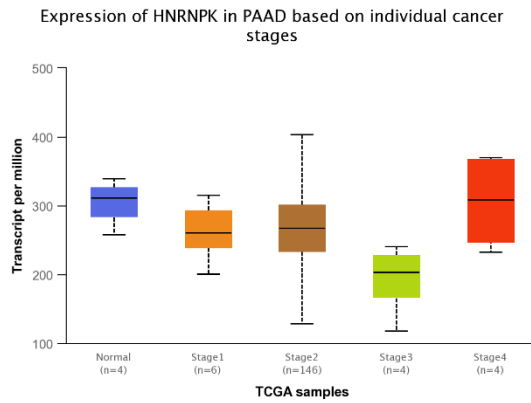

N-vs-St1 2.200400E-01  
 N-vs-St2 3.560400E-01  
 N-vs-St3 3.302500E-02  
 N-vs-St4 9.584000E-01  
 St1-vs-St2 9.438600E-01  
 St1-vs-St3 4.954400E-02  
 St1-vs-St4 2.693800E-01  
 St2-vs-St3 4.389900E-02  
 St2-vs-St4 2.592000E-01  
 St3-vs-St4 4.696400E-02

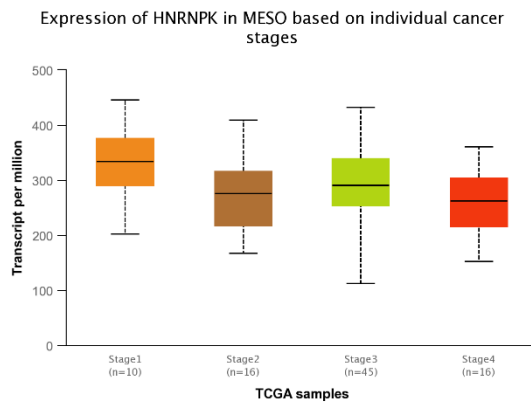

St1-vs-St2 4.972100E-02  
 St1-vs-St3 4.480300E-02  
 St1-vs-St4 9.811600E-02  
 St2-vs-St3 7.466600E-01  
 St2-vs-St4 9.577400E-01  
 St3-vs-St4 8.142200E-01

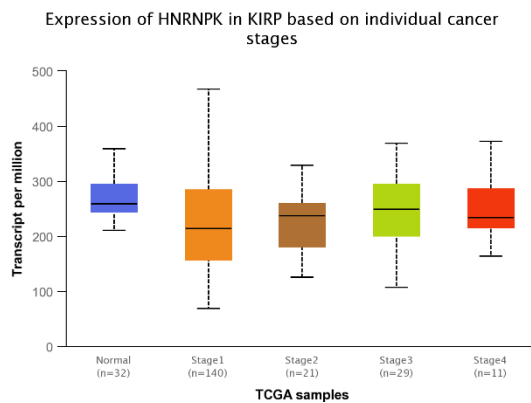

N-vs-St1 3.9801999999777E-05  
 N-vs-St2 2.331700E-02  
 N-vs-St3 1.338570E-01  
 N-vs-St4 2.308600E-01  
 St1-vs-St2 5.171600E-01  
 St1-vs-St3 1.406150E-01  
 St1-vs-St4 3.183200E-01  
 St2-vs-St3 5.110600E-01  
 St2-vs-St4 5.550000E-01  
 St3-vs-St4 9.532800E-01

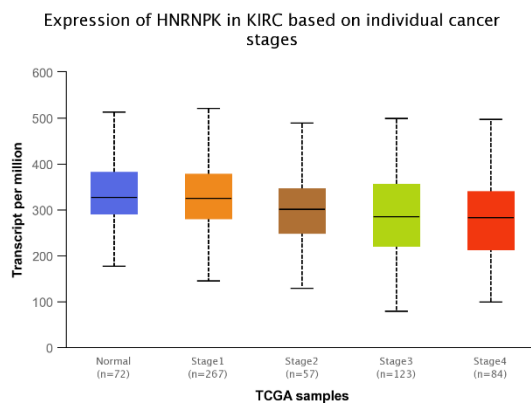

N-vs-St1 4.430100E-02  
 N-vs-St2 1.145970E-02  
 N-vs-St3 1.67500000003429E-06  
 N-vs-St4 1.50868999999609E-05  
 St1-vs-St2 1.652410E-01  
 St1-vs-St3 5.83650000000047E-05  
 St1-vs-St4 3.401100E-04  
 St2-vs-St3 1.658750E-01  
 St2-vs-St4 1.854650E-01  
 St3-vs-St4 9.723400E-01

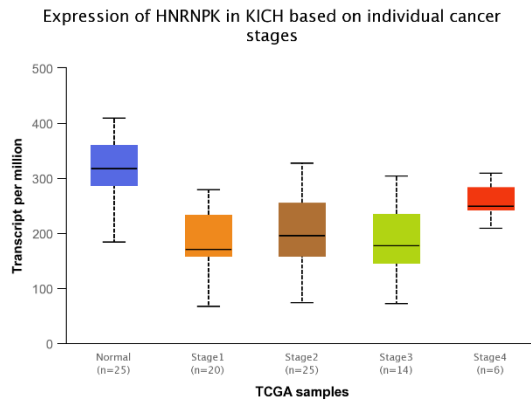

**N-vs-St1** 1.14220000124732E-09  
**N-vs-St2** 1.41689999733075E-08  
**N-vs-St3** 3.28010000272272E-08  
**N-vs-St4** 2.922400E-03  
**St1-vs-St2** 3.803200E-01  
**St1-vs-St3** 9.645200E-01  
**St1-vs-St4** 1.217830E-01  
**St2-vs-St3** 4.639800E-01  
**St2-vs-St4** 3.259600E-01  
**St3-vs-St4** 1.617790E-01

## FBXW2

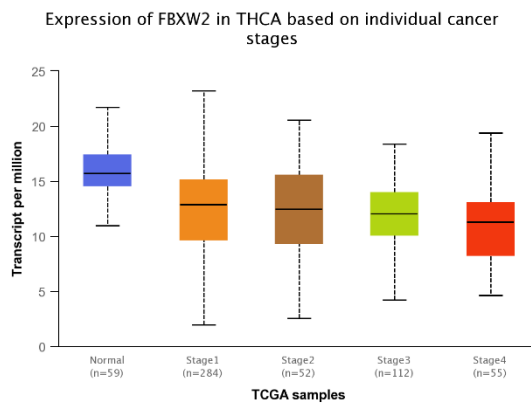

**N-vs-St1** 3.69779999953579E-07  
**N-vs-St2** 1.377650E-03  
**N-vs-St3** 1.20690000215973E-08  
**N-vs-St4** 1.71619995992245E-09  
**St1-vs-St2** 7.266200E-01  
**St1-vs-St3** 6.522400E-02  
**St1-vs-St4** 9.579600E-03  
**St2-vs-St3** 1.431830E-01  
**St2-vs-St4** 3.428100E-02  
**St3-vs-St4** 2.795800E-01

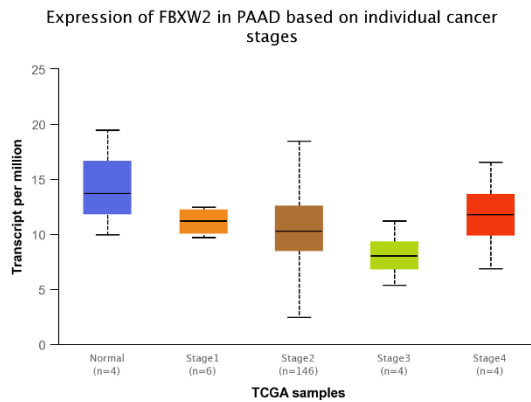

**N-vs-St1** 3.128000E-01  
**N-vs-St2** 4.403700E-02  
**N-vs-St3** 6.980000E-02  
**N-vs-St4** 4.580800E-01  
**St1-vs-St2** 6.011000E-01  
**St1-vs-St3** 2.176200E-01  
**St1-vs-St4** 8.223200E-01  
**St2-vs-St3** 1.787400E-01  
**St2-vs-St4** 4.349000E-01  
**St3-vs-St4** 1.736450E-01

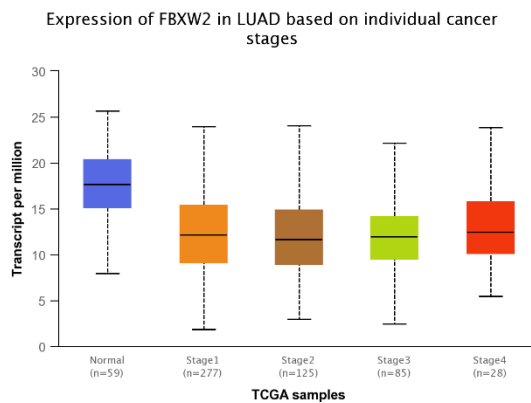

**N-vs-St1** 1.25949994878027E-09  
**N-vs-St2** 2.6944000031115E-08  
**N-vs-St3** 3.58500000019468E-07  
**N-vs-St4** 4.156600E-04  
**St1-vs-St2** 7.530600E-01  
**St1-vs-St3** 9.670400E-01  
**St1-vs-St4** 6.231600E-01  
**St2-vs-St3** 8.495000E-01  
**St2-vs-St4** 5.468000E-01  
**St3-vs-St4** 6.704000E-01

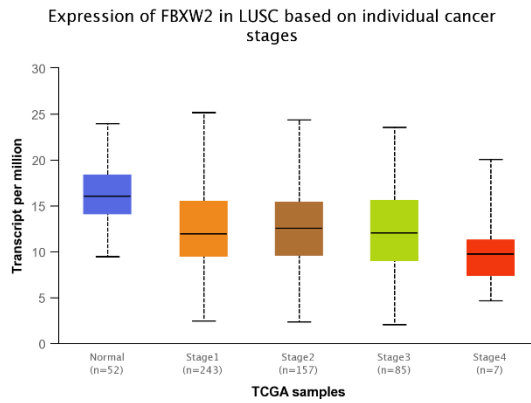

**N-vs-St1** 1.5374999998176E-06  
**N-vs-St2** 5.724499999928E-05  
**N-vs-St3** 4.6033999999695E-06  
**N-vs-St4** 3.854200E-01  
**St1-vs-St2** 7.986000E-01  
**St1-vs-St3** 5.950000E-01  
**St1-vs-St4** 9.632400E-01  
**St2-vs-St3** 4.551400E-01  
**St2-vs-St4** 9.952600E-01  
**St3-vs-St4** 8.805600E-01

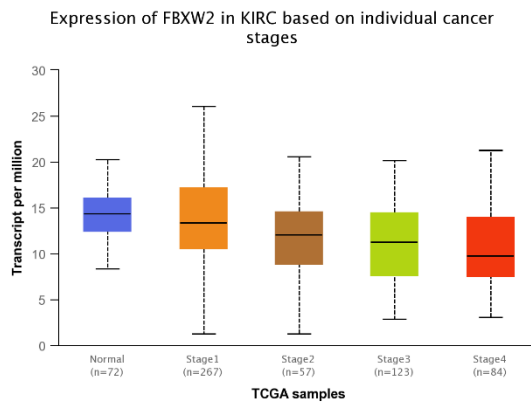

**N-vs-St1** 6.838000E-02  
**N-vs-St2** 3.004900E-03  
**N-vs-St3** 2.69010036468842E-10  
**N-vs-St4** 2.08919992417123E-10  
**St1-vs-St2** 4.415700E-02  
**St1-vs-St3** 1.34530000028832E-07  
**St1-vs-St4** 7.19530000026225E-08  
**St2-vs-St3** 8.993900E-02  
**St2-vs-St4** 2.923900E-02  
**St3-vs-St4** 4.074800E-01

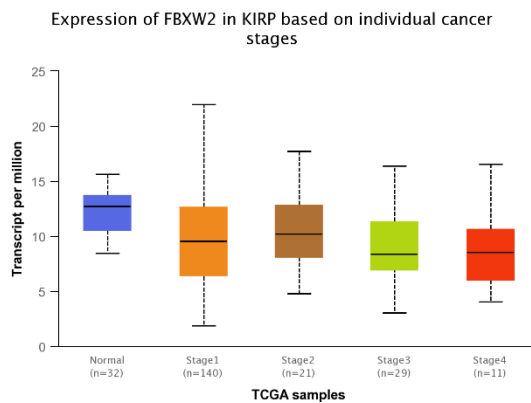

**N-vs-St1** 9.642700E-04  
**N-vs-St2** 3.239200E-01  
**N-vs-St3** 1.774400E-02  
**N-vs-St4** 1.466150E-01  
**St1-vs-St2** 4.874400E-01  
**St1-vs-St3** 6.297800E-01  
**St1-vs-St4** 7.219800E-01  
**St2-vs-St3** 3.371400E-01  
**St2-vs-St4** 4.426800E-01  
**St3-vs-St4** 9.674600E-01

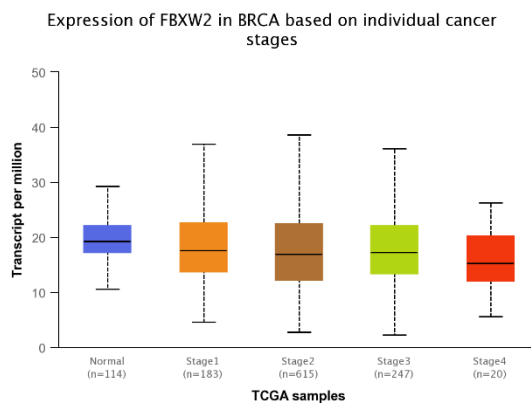

**N-vs-St1** 5.367200E-01  
**N-vs-St2** 2.055700E-02  
**N-vs-St3** 2.698000E-01  
**N-vs-St4** 2.078200E-01  
**St1-vs-St2** 2.112000E-01  
**St1-vs-St3** 6.989800E-01  
**St1-vs-St4** 3.553600E-01  
**St2-vs-St3** 3.760800E-01  
**St2-vs-St4** 6.299000E-01  
**St3-vs-St4** 4.543400E-01

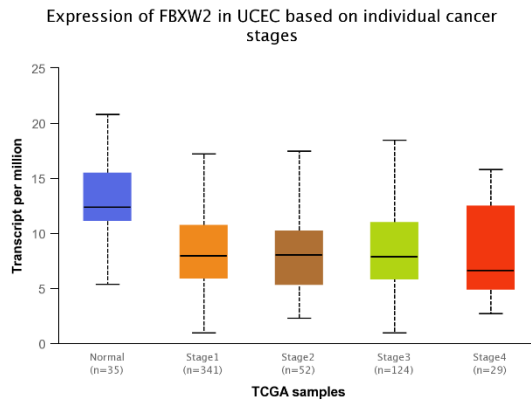

**N-vs-St1** 2.10520489929422E-12  
**N-vs-St2** 1.6872000019319E-08  
**N-vs-St3** 1.56060000477964E-08  
**N-vs-St4** 1.57077999999311E-05  
**St1-vs-St2** 6.939200E-01  
**St1-vs-St3** 3.953000E-01  
**St1-vs-St4** 8.516400E-01  
**St2-vs-St3** 4.048000E-01  
**St2-vs-St4** 9.323000E-01  
**St3-vs-St4** 5.842000E-01

## APC

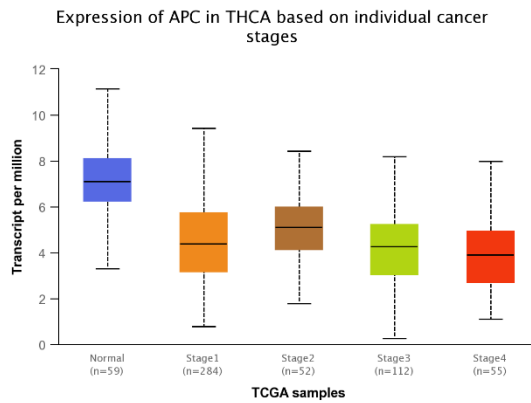

**N-vs-St1** 1.46105350040671E-13  
**N-vs-St2** 5.168200E-04  
**N-vs-St3** 9.40358901857508E-14  
**N-vs-St4** 1.95166105498856E-12  
**St1-vs-St2** 2.266000E-02  
**St1-vs-St3** 1.335610E-01  
**St1-vs-St4** 9.637200E-03  
**St2-vs-St3** 2.617000E-03  
**St2-vs-St4** 6.610900E-04  
**St3-vs-St4** 2.922400E-01

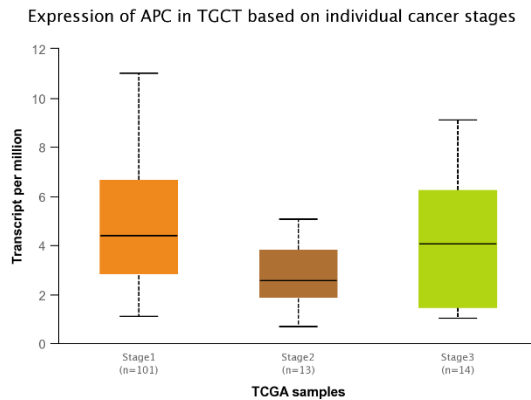

**St1-vs-St2** 1.367610E-04  
**St1-vs-St3** 3.000400E-01  
**St2-vs-St3** 1.154810E-01

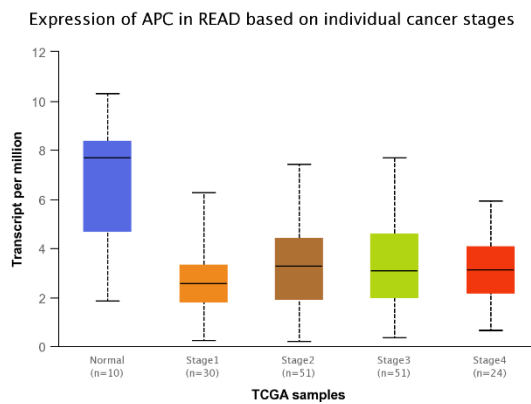

**N-vs-St1** 2.00339999999466E-05  
**N-vs-St2** 2.38329999999731E-05  
**N-vs-St3** 1.83899999994797E-06  
**N-vs-St4** 3.623400E-03  
**St1-vs-St2** 2.277600E-01  
**St1-vs-St3** 4.114400E-01  
**St1-vs-St4** 7.111600E-01  
**St2-vs-St3** 6.043400E-01  
**St2-vs-St4** 4.277600E-01  
**St3-vs-St4** 6.922200E-01

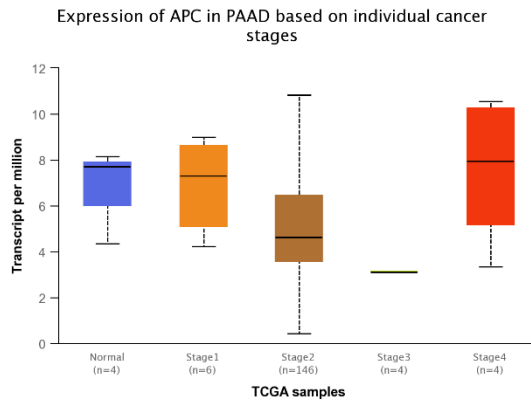

N-vs-St1 9.263600E-01  
 N-vs-St2 2.904600E-01  
 N-vs-St3 1.086350E-01  
 N-vs-St4 7.647800E-01  
 St1-vs-St2 1.055820E-01  
 St1-vs-St3 1.039580E-02  
 St1-vs-St4 7.466800E-01  
 St2-vs-St3 9.71530000000165E-05  
 St2-vs-St4 7.676200E-02  
 St3-vs-St4 1.015840E-01

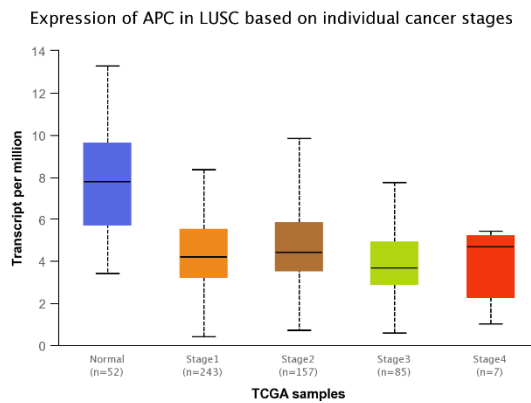

N-vs-St1 5.34560173903742E-11  
 N-vs-St2 8.12627742874383E-12  
 N-vs-St3 1.44617651187673E-12  
 N-vs-St4 3.247900E-04  
 St1-vs-St2 1.315780E-01  
 St1-vs-St3 6.230400E-02  
 St1-vs-St4 2.508400E-01  
 St2-vs-St3 6.878200E-03  
 St2-vs-St4 1.632400E-01  
 St3-vs-St4 6.130200E-01

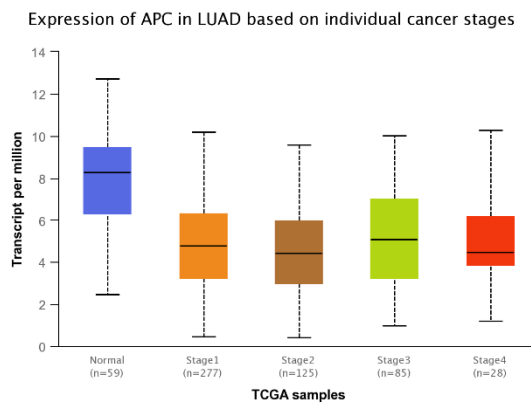

N-vs-St1 1.11022302462516E-16  
 N-vs-St2 2.71216382685679E-12  
 N-vs-St3 5.98589955380646E-10  
 N-vs-St4 2.46589999999269E-05  
 St1-vs-St2 1.228960E-01  
 St1-vs-St3 6.077600E-01  
 St1-vs-St4 6.796200E-01  
 St2-vs-St3 9.175600E-02  
 St2-vs-St4 2.134400E-01  
 St3-vs-St4 9.317200E-01

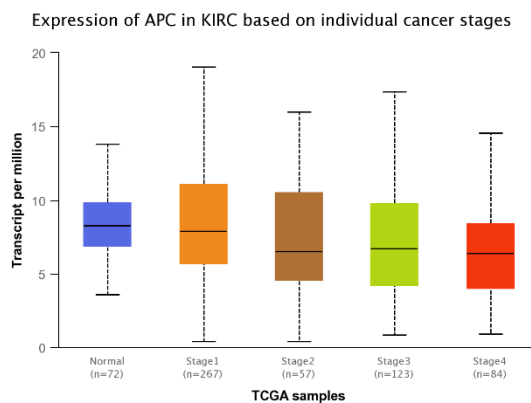

N-vs-St1 9.462600E-01  
 N-vs-St2 2.450600E-01  
 N-vs-St3 2.036500E-03  
 N-vs-St4 3.71550000000109E-05  
 St1-vs-St2 1.851150E-01  
 St1-vs-St3 1.060310E-03  
 St1-vs-St4 3.16479999995511E-06  
 St2-vs-St3 3.689200E-01  
 St2-vs-St4 7.904100E-02  
 St3-vs-St4 2.062000E-01

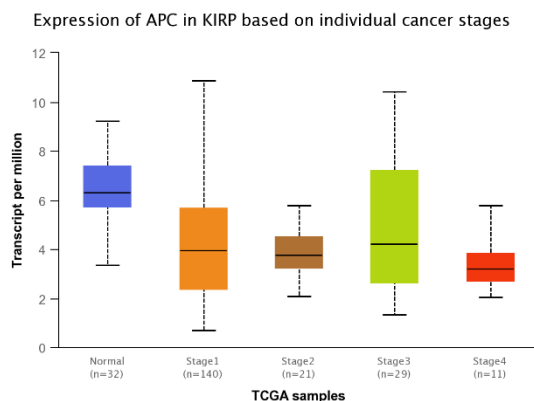

**N-vs-St1** 3.9078000000257E-05  
**N-vs-St2** 7.922000E-03  
**N-vs-St3** 2.300200E-02  
**N-vs-St4** 8.583700E-02  
**St1-vs-St2** 9.906600E-01  
**St1-vs-St3** 6.184200E-01  
**St1-vs-St4** 9.914000E-01  
**St2-vs-St3** 6.531200E-01  
**St2-vs-St4** 9.981000E-01  
**St3-vs-St4** 7.302800E-01

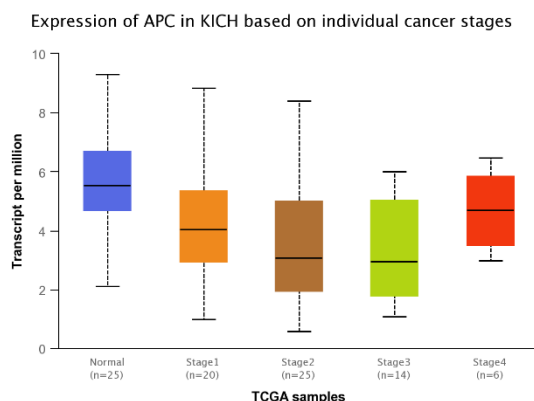

**N-vs-St1** 4.329700E-02  
**N-vs-St2** 1.561210E-03  
**N-vs-St3** 3.700400E-02  
**N-vs-St4** 2.692000E-01  
**St1-vs-St2** 2.813000E-01  
**St1-vs-St3** 6.932600E-01  
**St1-vs-St4** 7.340600E-01  
**St2-vs-St3** 6.252600E-01  
**St2-vs-St4** 2.849800E-01  
**St3-vs-St4** 5.784000E-01

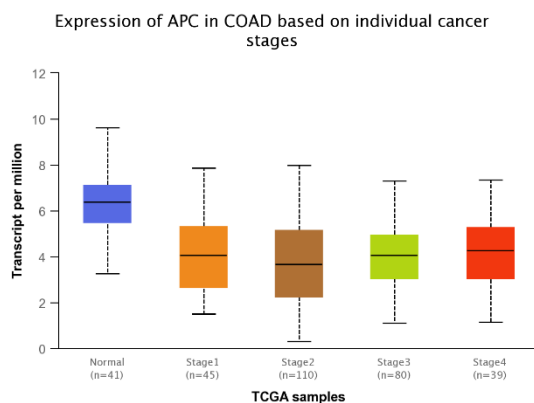

**N-vs-St1** 9.30050003677962E-09  
**N-vs-St2** 7.63955565474816E-12  
**N-vs-St3** 7.31399996123372E-09  
**N-vs-St4** 7.15790000049843E-07  
**St1-vs-St2** 7.293200E-01  
**St1-vs-St3** 5.848800E-01  
**St1-vs-St4** 3.639000E-01  
**St2-vs-St3** 2.699600E-01  
**St2-vs-St4** 1.943600E-01  
**St3-vs-St4** 5.694000E-01

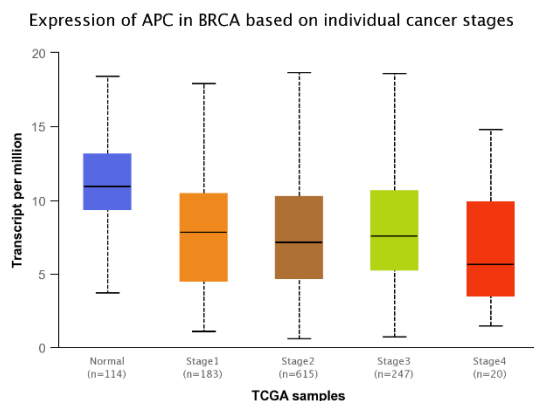

**N-vs-St1** 3.10680003945407E-09  
**N-vs-St2** 4.36317648677687E-14  
**N-vs-St3** 3.30579996710156E-09  
**N-vs-St4** 1.82077999999475E-05  
**St1-vs-St2** 4.210600E-01  
**St1-vs-St3** 6.298400E-01  
**St1-vs-St4** 2.369400E-01  
**St2-vs-St3** 1.267210E-01  
**St2-vs-St4** 3.385800E-01  
**St3-vs-St4** 1.806760E-01

Expression of APC in BLCA based on individual cancer stages

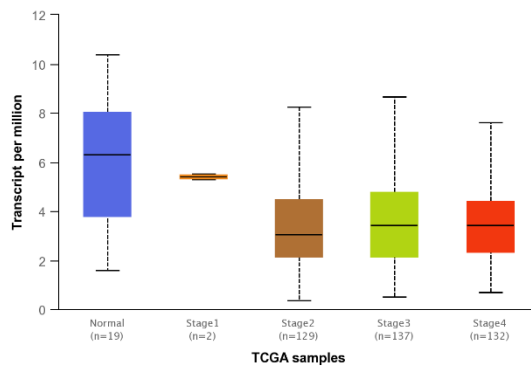

**N-vs-St1** 8.031200E-01  
**N-vs-St2** 2.761900E-03  
**N-vs-St3** 1.418630E-04  
**N-vs-St4** 3.479100E-03  
**St1-vs-St2** 1.962570E-01  
**St1-vs-St3** 2.763800E-01  
**St1-vs-St4** 1.936370E-01  
**St2-vs-St3** 4.746200E-01  
**St2-vs-St4** 7.457200E-01  
**St3-vs-St4** 6.752400E-01

Expression of APC in UCEC based on individual cancer stages

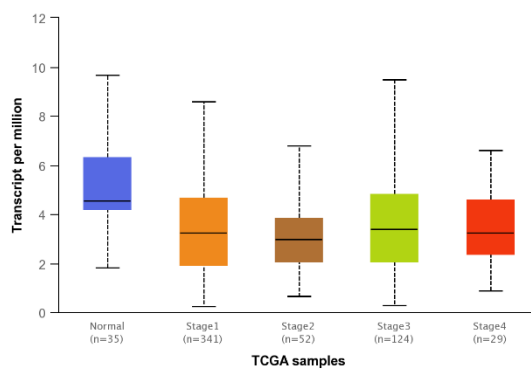

**N-vs-St1** 1.85979998068575E-09  
**N-vs-St2** 6.21359999999349E-05  
**N-vs-St3** 6.40519999999256E-05  
**N-vs-St4** 4.41010000000741E-05  
**St1-vs-St2** 7.883000E-01  
**St1-vs-St3** 1.334850E-01  
**St1-vs-St4** 9.187400E-01  
**St2-vs-St3** 4.718000E-01  
**St2-vs-St4** 7.990400E-01  
**St3-vs-St4** 2.881600sE-01
