# Supplementary figures and images for: Comprehensive biological information analysis of PTEN gene in pan-cancer
Source: Research Square preprint supplement (doi:10.21203/rs.3.rs-388887/v1), 2021-04-12

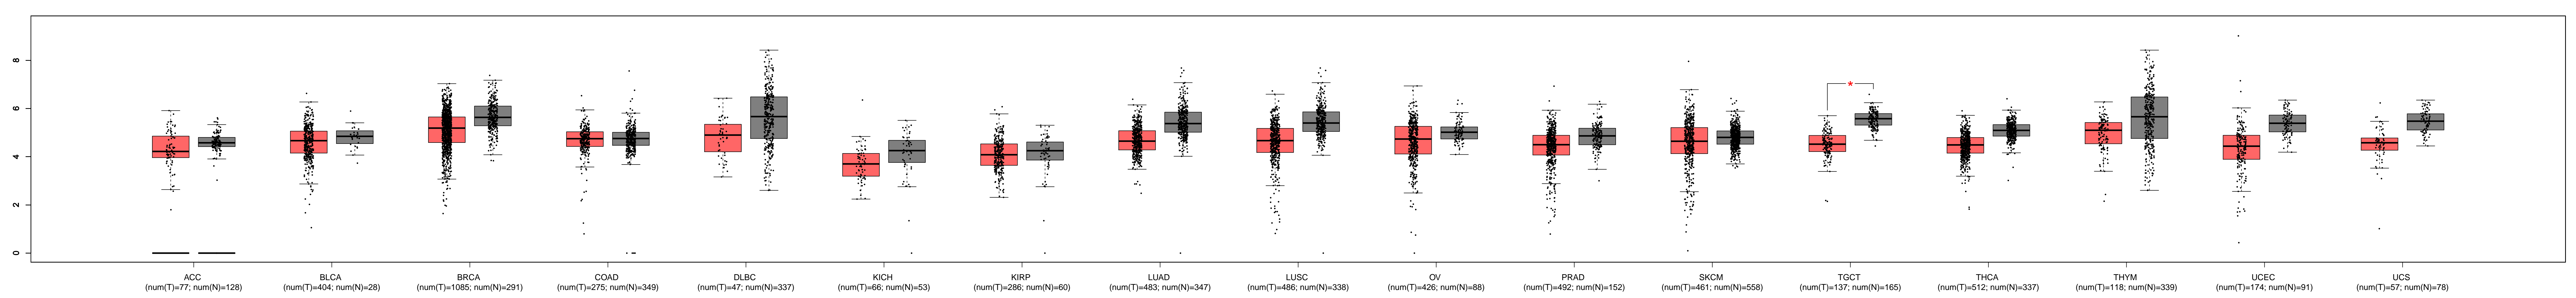

Supplement: Supplementary file 2 [file Figure S1-PTEN Expression_boxplot_.pdf › Supplementary Material/Figure S1-PTEN Expression_boxplot_.pdf]
